# Supplementary material for: Systematic Qualitative and Quantitative Analyses of Wenxin Granule via Ultra-High Performance Liquid Chromatography Coupled with Ion Mobility Quadrupole Time-of-Flight Mass Spectrometry and Triple Quadrupole–Linear Ion Trap Mass Spectrometry
Source: MDPI journal article supplement (doi:10.3390/molecules27113647), 2022-06-06
Supplement: s1 [file s1]

Supplementary Materials

**Systematic Qualitative and Quantitative Analyses of Wenxin Granule by Ultra-High Performance Liquid Chromatography Coupled with Ion Mobility Quadrupole Time-of-Flight Mass Spectrometry and Triple Quadrupole/Linear Ion-Trap Mass Spectrometry**

Yueguang Mi <sup>1,†</sup>, Wandu Hu <sup>1,†</sup>, Weiwei Li <sup>1,†</sup>, Shiyu Wan <sup>2</sup>, Xiaoyan Xu <sup>1</sup>, Meiyu Liu <sup>1</sup>, Hongda Wang <sup>1</sup>, Quanxi Mei <sup>2</sup>, Qinhua Chen <sup>2</sup>, Yang Yang <sup>2</sup>, Boxue Chen <sup>1</sup>, Meiting Jiang <sup>1</sup>, Xue Li <sup>1</sup>, Wenzhi Yang <sup>1,\*</sup> and Dean Guo <sup>1,3</sup>

<sup>1</sup> State Key Laboratory of Component-Based Chinese Medicine, Tianjin Key Laboratory of TCM Chemistry and Analysis, Tianjin University of Traditional Chinese Medicine, 10 Poyanghu Road, Jinghai, Tianjin 301617, China; miyueguang@163.com (Y.M.); hwdcrown@163.com (W.H.); lww11413@163.com (W.L.); xxy\_0421@163.com (X.X.); lmydz1999@163.com (M.L.); 17862987156@163.com (H.W.); cbx1026tju@163.com (B.C.); jiangmeiting21@163.com (M.J.); tjdxsyx@163.com (X.L.)

<sup>2</sup> Shenzhen Baoan Authentic TCM Therapy Hospital, Shenzhen 518101, China; wanshiyuaaa@163.com (S.W.); meiquanxi@163.com (Q.M.); cqh77@163.com (Q.C.); yangyanghb@outlook.com (Y.Y.)

<sup>3</sup> Shanghai Research Center for Modernization of Traditional Chinese Medicine, National Engineering Laboratory for TCM Standardization Technology, Shanghai Institute of Materia Medica, Chinese Academy of Sciences, 501 Haik Road, Shanghai 201203, China; gda5958@163.com (D.G.)

\* Correspondence: wzyang0504@tjutcm.edu.cn, Tel.: +86-022-5979-1833

† These authors contributed equally to this work.

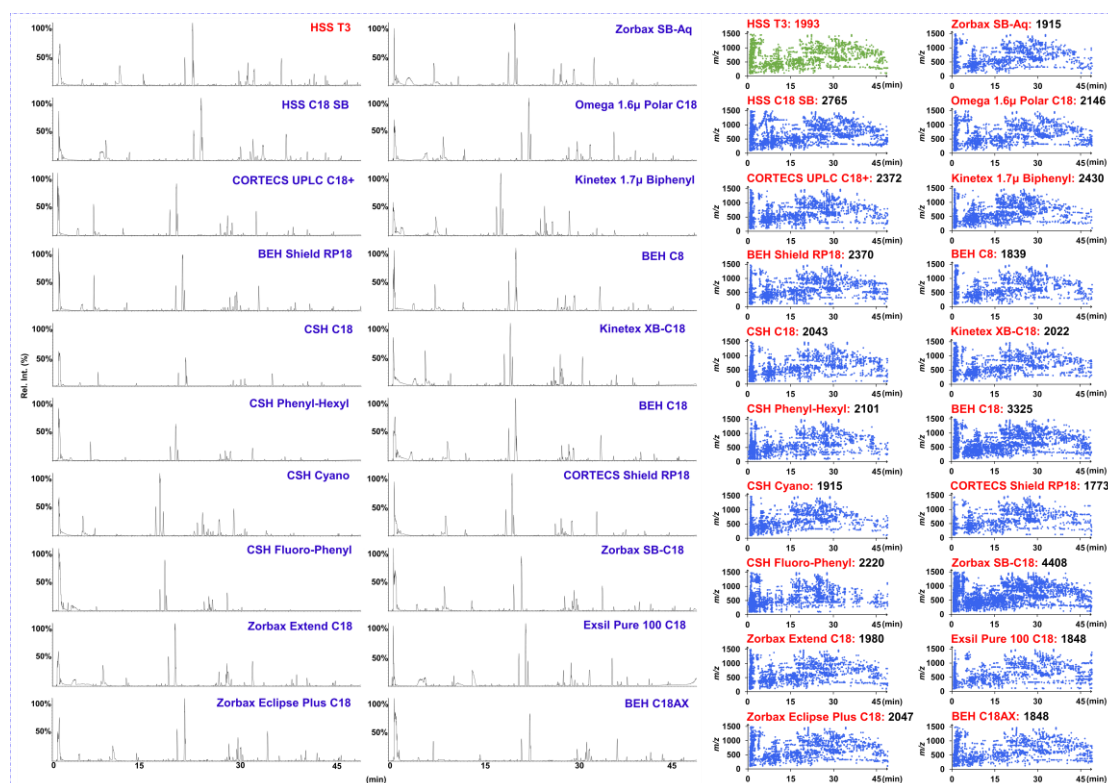

**Figure S1.** Selection of the stationary phase for the ultra-high performance liquid chromatography (UHPLC) separation of the multicomponents from WXG. The left shows the base peak intensity (BPI) chromatograms obtained on 20 candidate columns; the right is the scatter plot of the components resolved by both MS and chromatographic separation on each column.

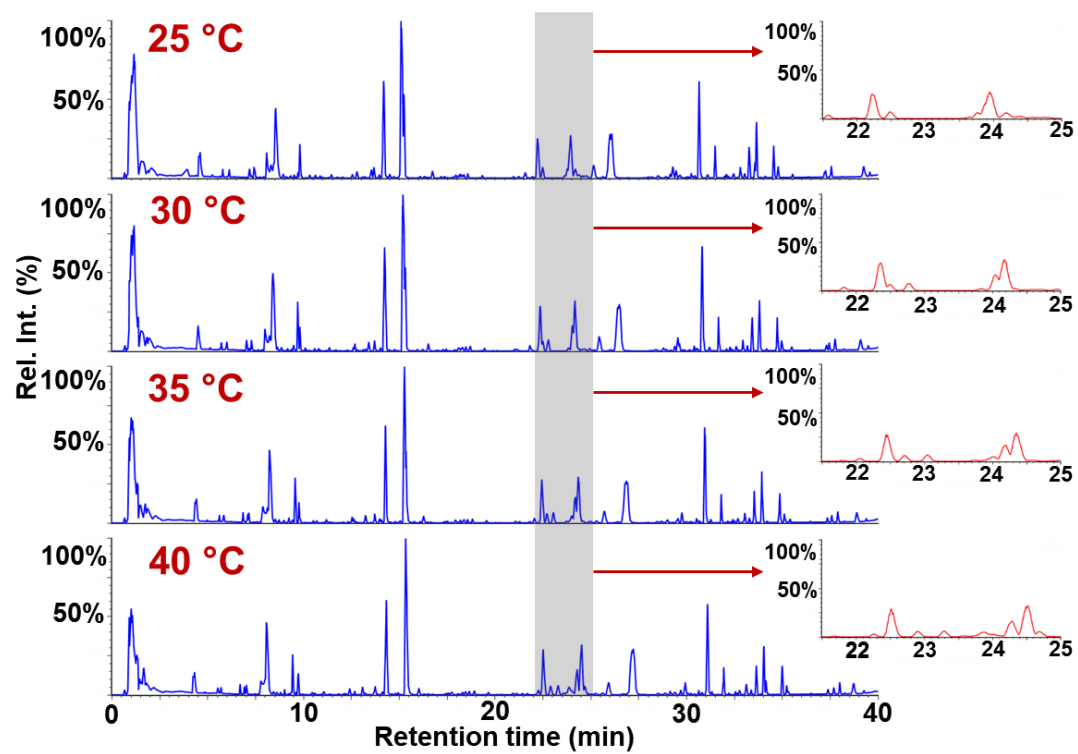

**Figure S2.** Optimization of the column temperature on the selected HSS T3 column for the separation of the multicomponents from WXG.

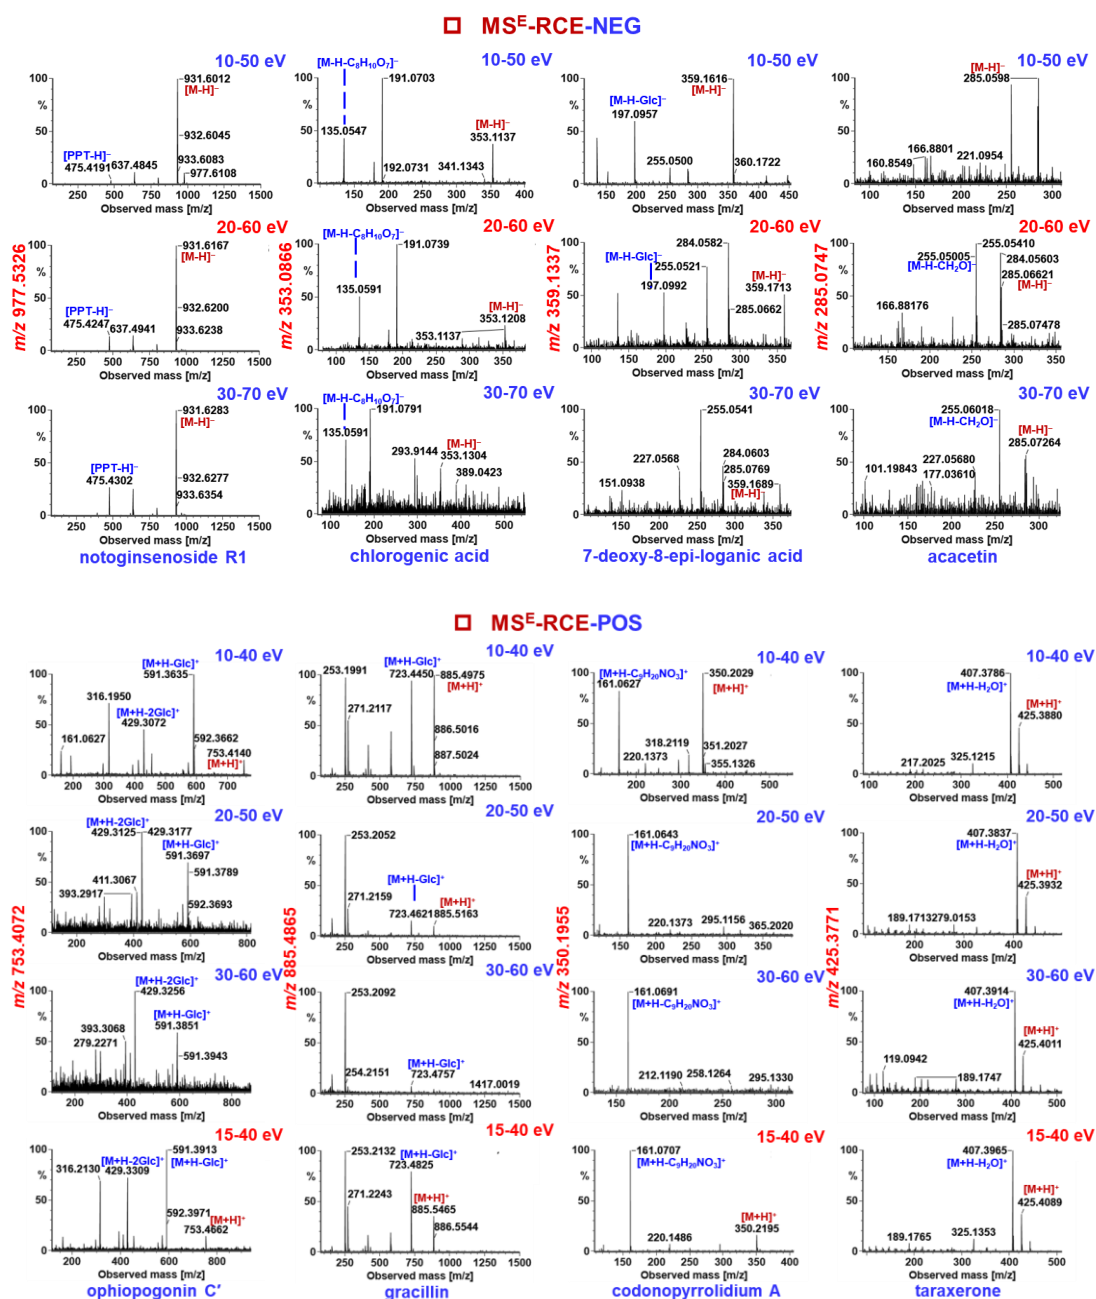

**Figure S3.** Optimization of ramp collision energy (RCE) for the HDMS<sup>E</sup> approach in both the negative (NEG) and positive (POS) modes using the representative compounds from WXG.

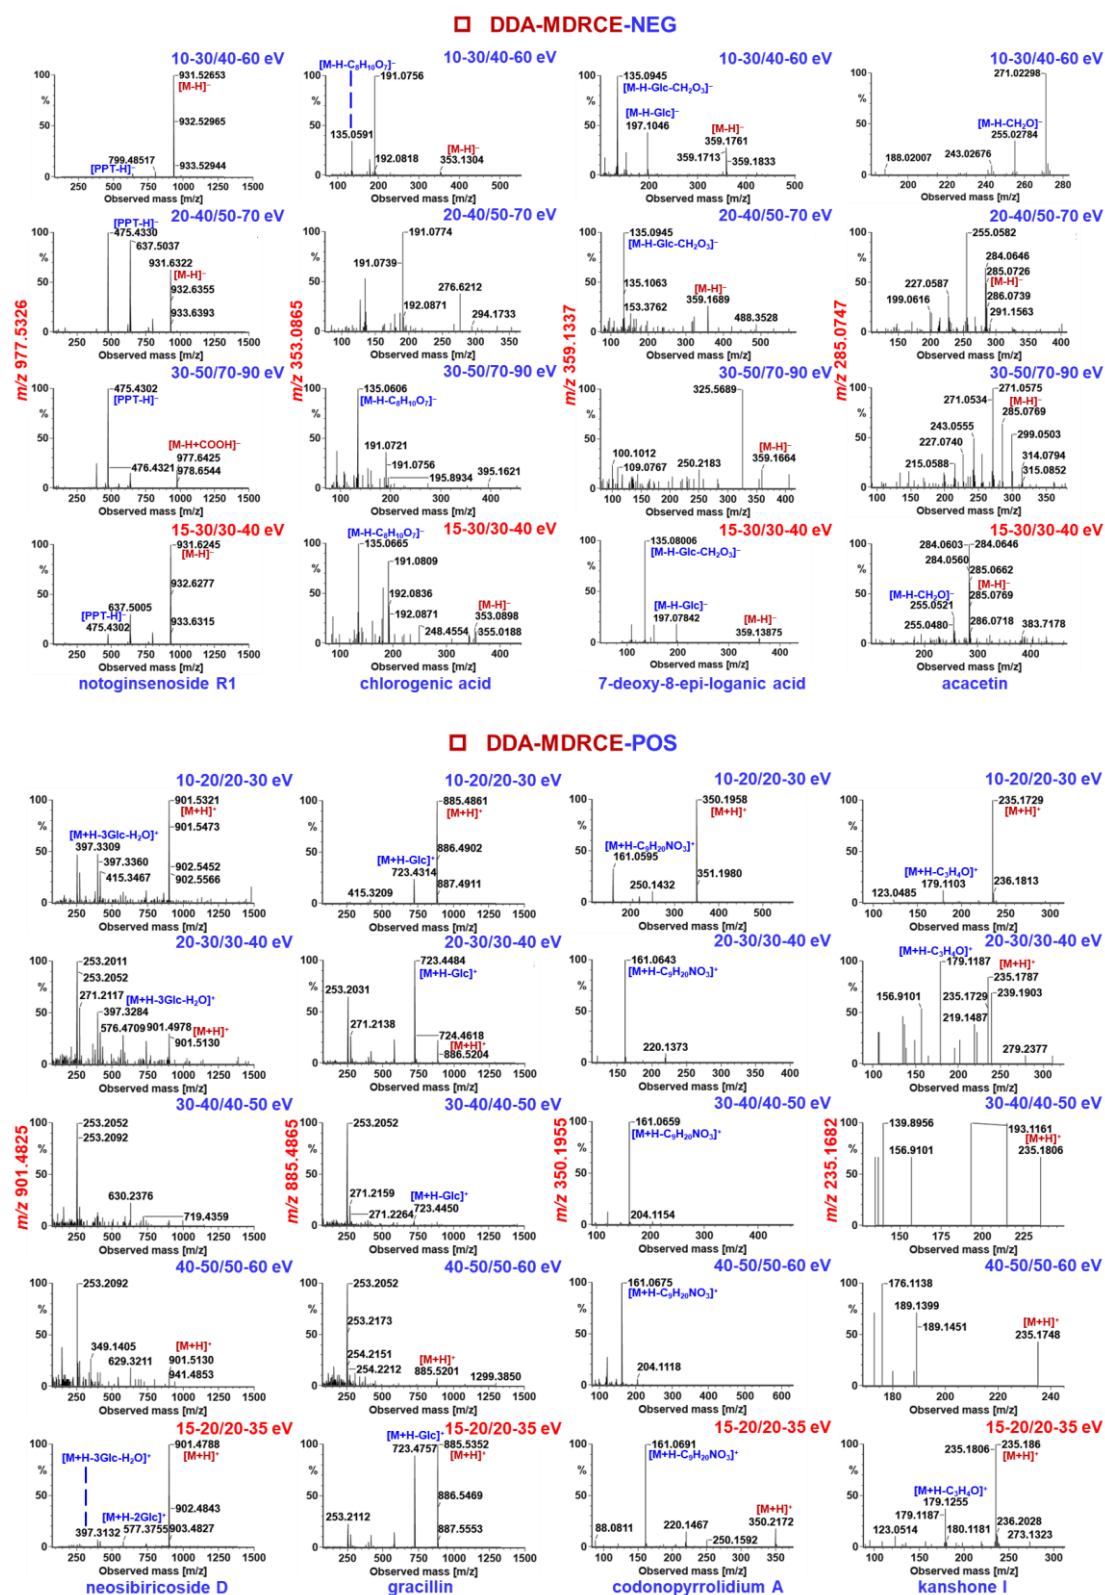

**Figure S4.** Optimization of mass-dependent ramp collision energy (MDRCE) for the HDDDA approach in both the negative (NEG) and positive (POS) modes using the representative compounds from WXG.

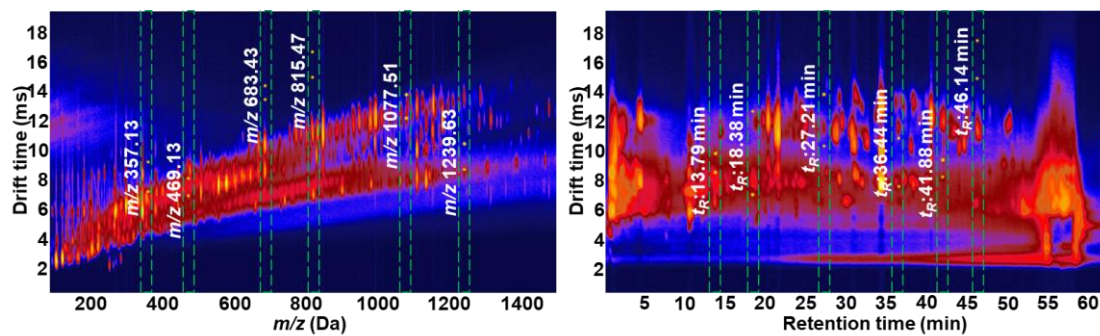

**Figure S5.** Drift time VS  $m/z$  showing the separation of isomers, and drift time VS  $t_R$  showing the separation of the co-eluting components from WXG.

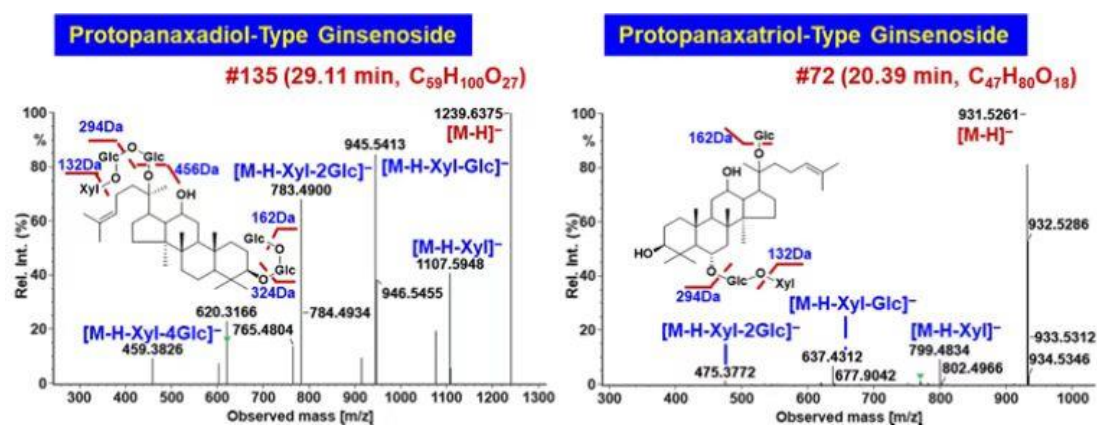

**Figure S6.** Annotation of the CID-MS<sup>2</sup> spectra of the representative protopanaxadiol (PPD)-, and protopanaxatriol (PPT)-ginsenosides from WXG by UNIFI<sup>TM</sup>, identified by comparison with the reference compounds.



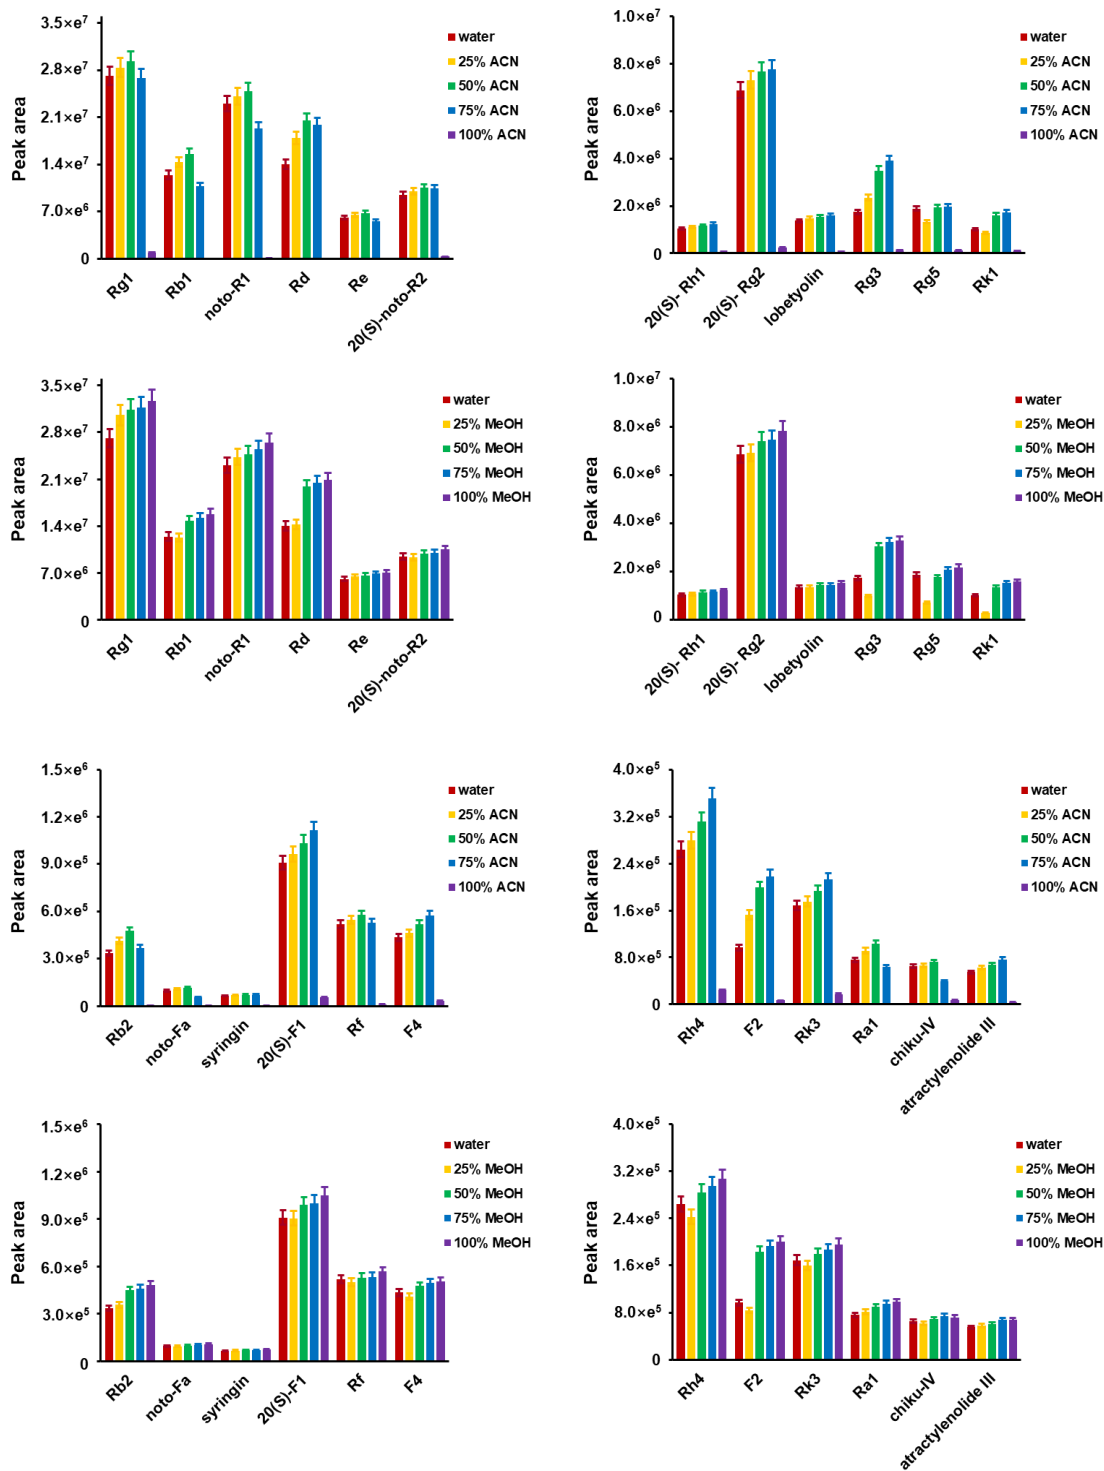

**Figure S7.** Comparison of different extraction solvents for 27 analytes.



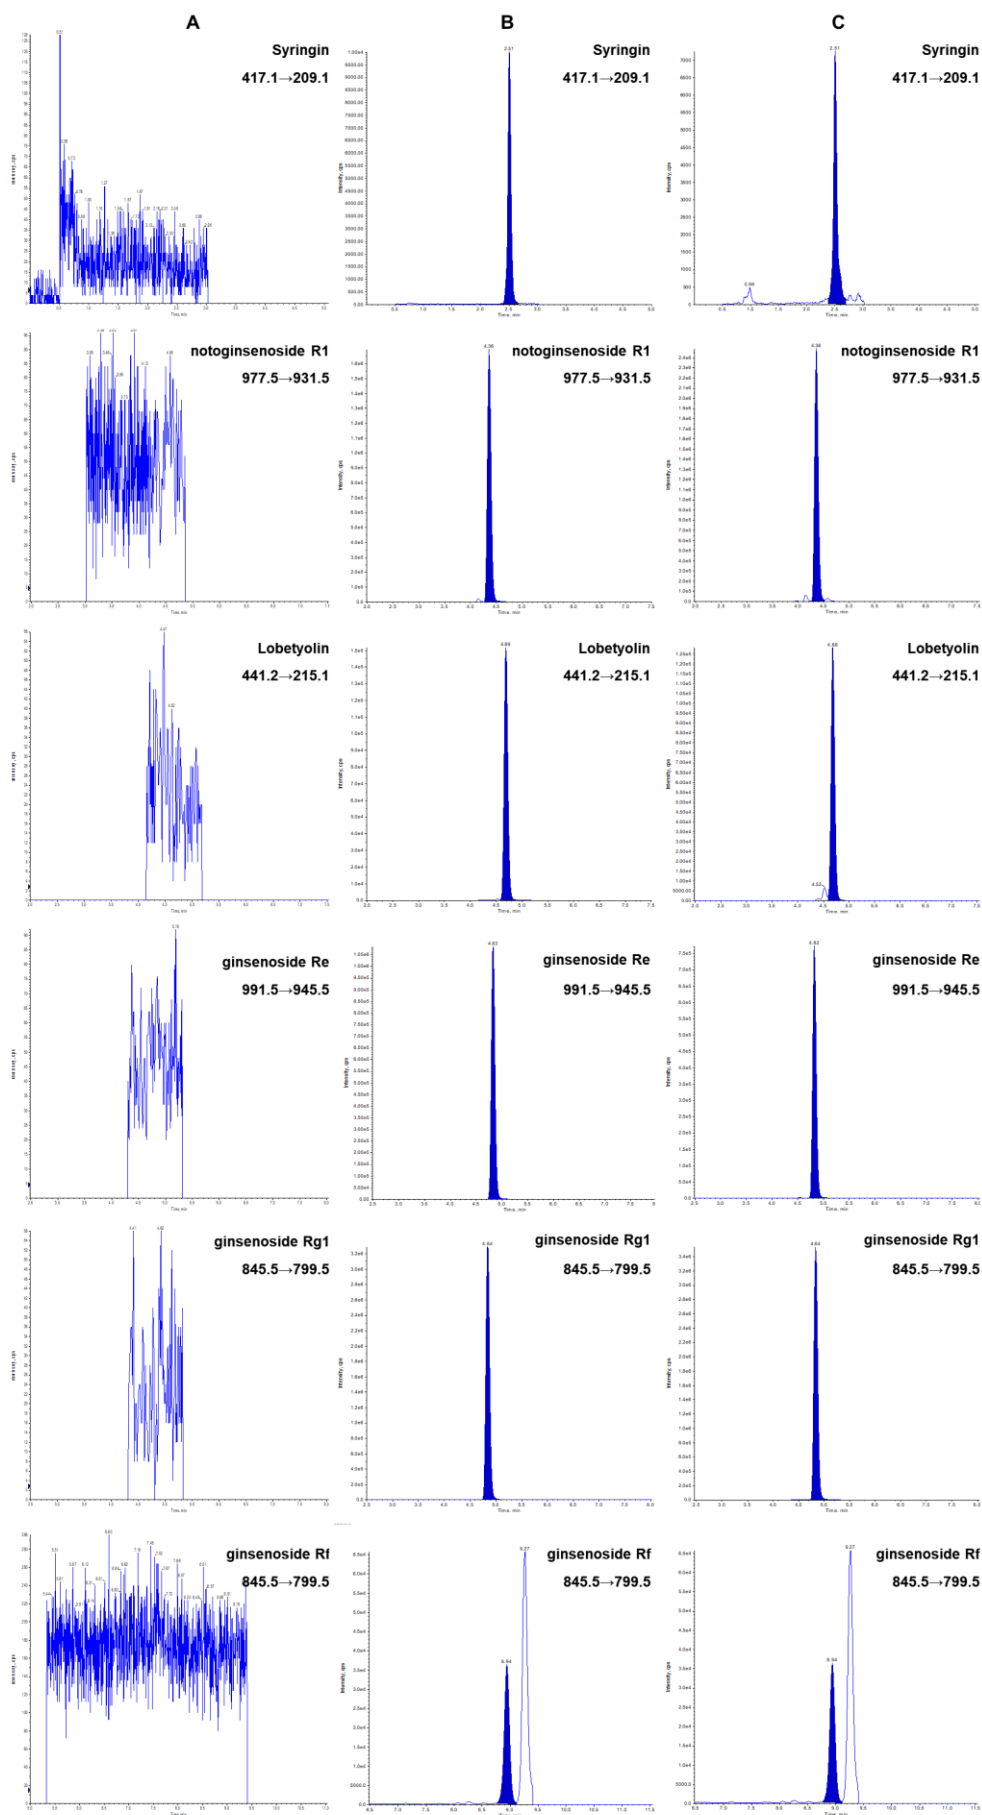

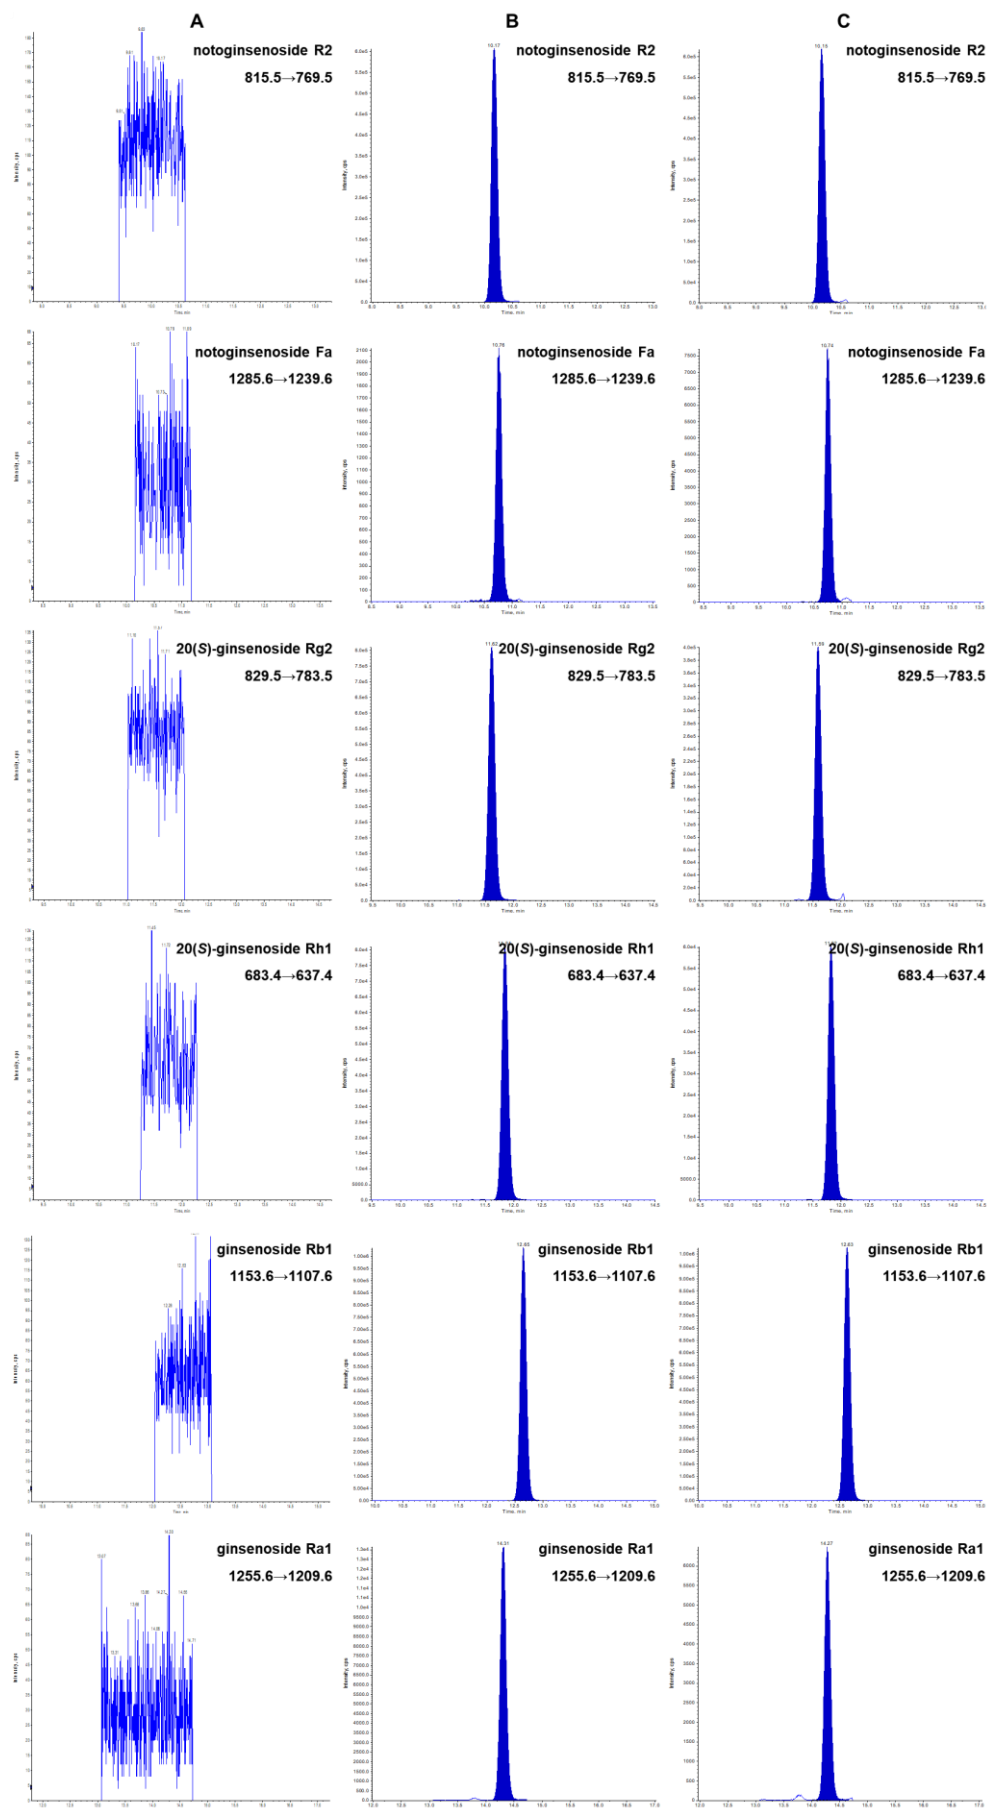

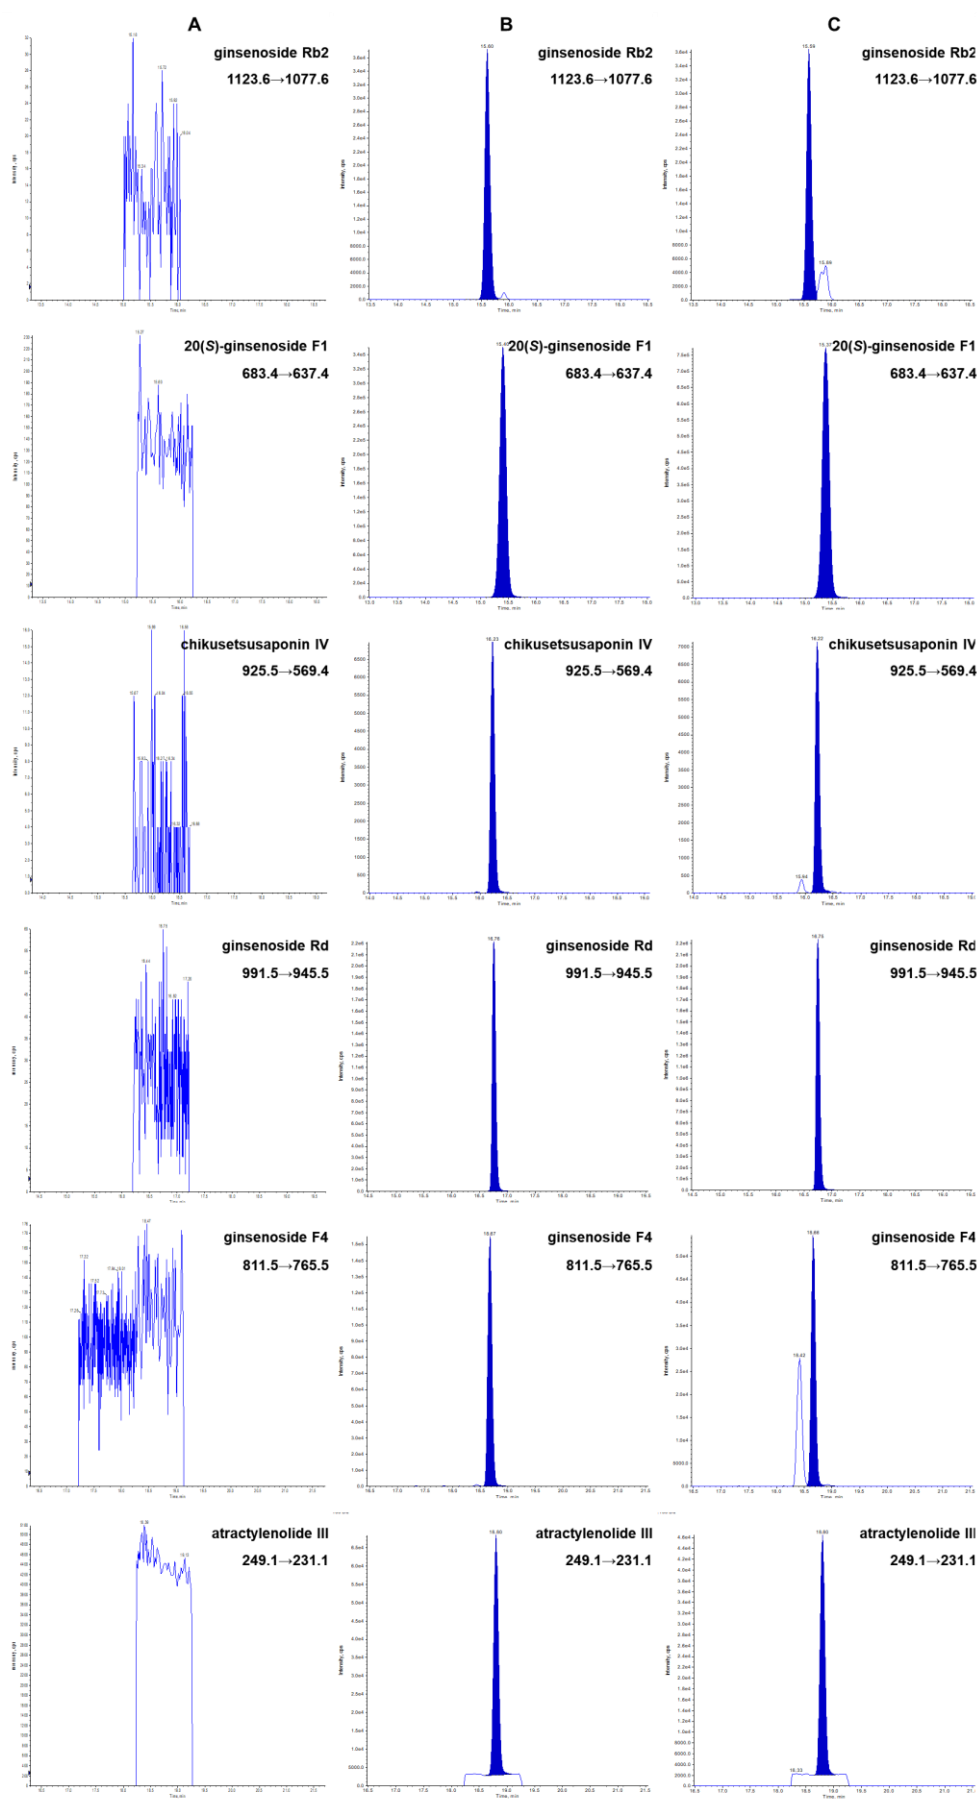

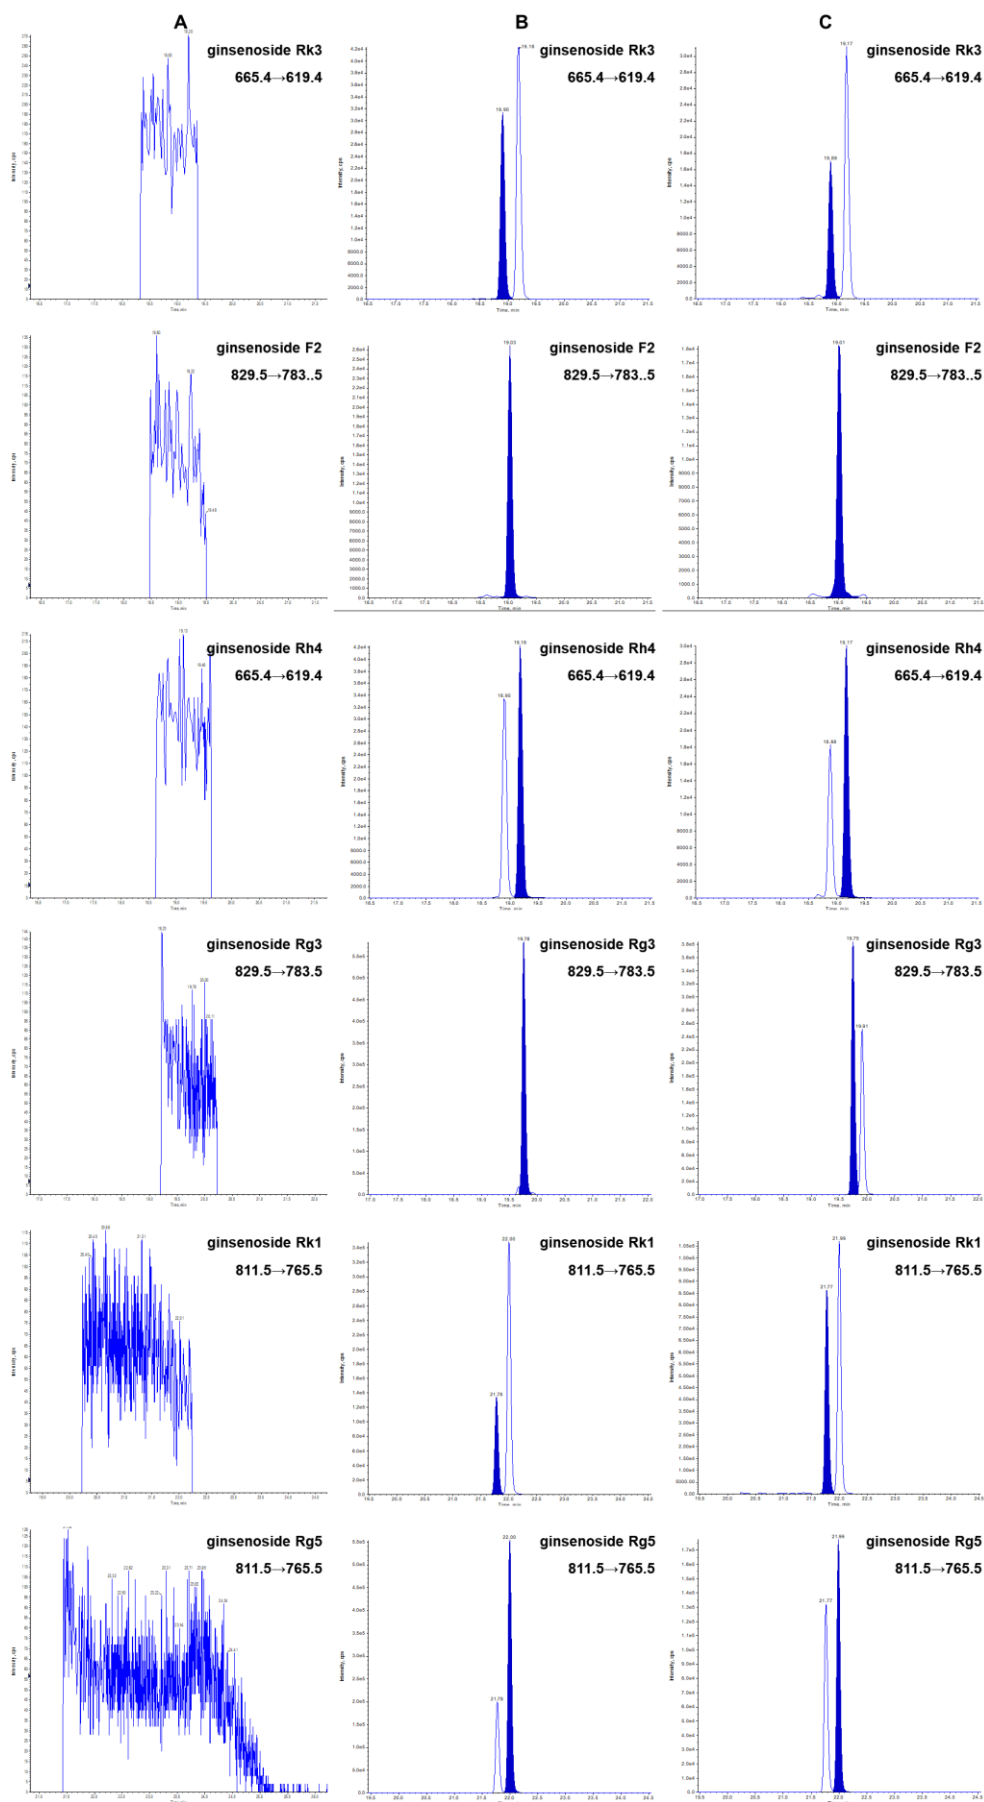

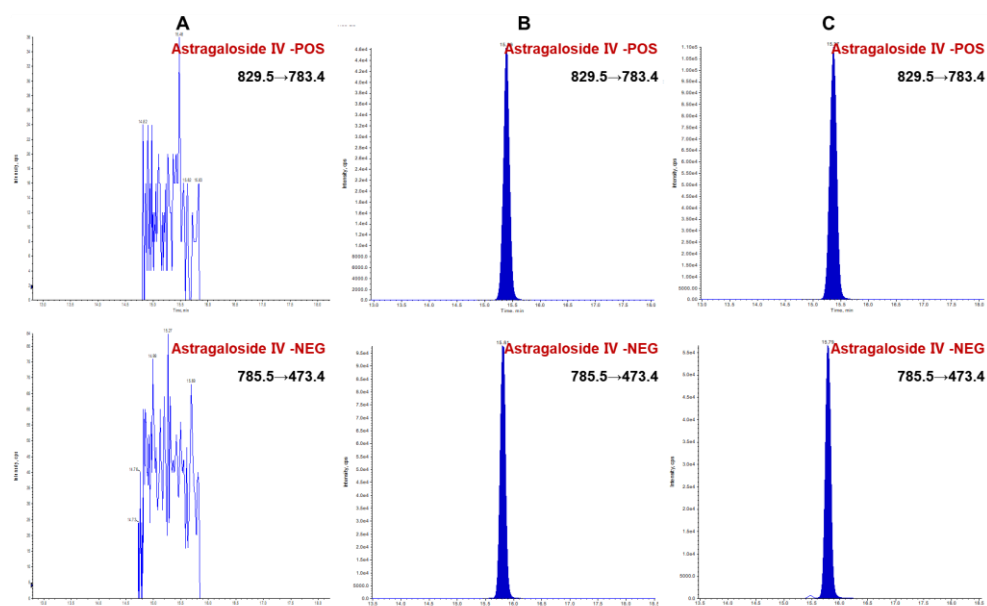

**Figure S8.** Representative sMRM chromatograms demonstrating the specificity of the established multicomponent quantitative assay approach. (A) The blank sample (methanol); (B) methanol spiked with the reference compounds and the internal standard; (C) the real sample of WXG.

**Table S1.** Information of 71 reference compounds used in this work.

| No. | Compound                             | Formula                                          | Exact Mass | Subclass                        |
|-----|--------------------------------------|--------------------------------------------------|------------|---------------------------------|
| 1*  | ginsenoside F1                       | C <sub>36</sub> H <sub>62</sub> O <sub>9</sub>   | 638.4394   | <b>PPT-type<br/>ginsenoside</b> |
| 2*  | ginsenoside Rh1                      | C <sub>36</sub> H <sub>62</sub> O <sub>9</sub>   | 638.4394   |                                 |
| 3   | ginsenoside F3                       | C <sub>41</sub> H <sub>70</sub> O <sub>13</sub>  | 770.4816   |                                 |
| 4*  | notoginsenoside R2                   | C <sub>41</sub> H <sub>70</sub> O <sub>13</sub>  | 770.4816   |                                 |
| 5   | ginsenoside Rg2                      | C <sub>42</sub> H <sub>72</sub> O <sub>13</sub>  | 784.4973   |                                 |
| 6*  | ginsenoside Rf                       | C <sub>42</sub> H <sub>72</sub> O <sub>14</sub>  | 800.4922   |                                 |
| 7*  | ginsenoside Rg1                      | C <sub>42</sub> H <sub>72</sub> O <sub>14</sub>  | 800.4922   |                                 |
| 8*  | notoginsenoside R1                   | C <sub>47</sub> H <sub>80</sub> O <sub>18</sub>  | 932.5345   |                                 |
| 9*  | ginsenoside Re                       | C <sub>48</sub> H <sub>82</sub> O <sub>18</sub>  | 946.5501   |                                 |
| 10  | 20( <i>S</i> )-protopanaxatriol      | C <sub>30</sub> H <sub>52</sub> O <sub>4</sub>   | 476.3866   |                                 |
| 11* | 20( <i>R</i> )-ginsenoside Rg2       | C <sub>42</sub> H <sub>72</sub> O <sub>13</sub>  | 784.4973   |                                 |
| 12  | ginsenoside Rh2                      | C <sub>36</sub> H <sub>62</sub> O <sub>8</sub>   | 622.4445   | <b>PPD-type<br/>ginsenoside</b> |
| 13  | 20( <i>R</i> )-ginsenoside Rh2       | C <sub>36</sub> H <sub>62</sub> O <sub>8</sub>   | 622.4445   |                                 |
| 14  | compound K                           | C <sub>36</sub> H <sub>62</sub> O <sub>8</sub>   | 622.4445   |                                 |
| 15* | ginsenoside F2                       | C <sub>42</sub> H <sub>72</sub> O <sub>13</sub>  | 784.4973   |                                 |
| 16* | ginsenoside Rg3                      | C <sub>42</sub> H <sub>72</sub> O <sub>13</sub>  | 784.4973   |                                 |
| 17  | ginsenoside Rs3                      | C <sub>44</sub> H <sub>74</sub> O <sub>14</sub>  | 826.5079   |                                 |
| 18  | notoginsenoside Ft1                  | C <sub>47</sub> H <sub>80</sub> O <sub>17</sub>  | 916.5396   |                                 |
| 19* | ginsenoside Rd                       | C <sub>48</sub> H <sub>82</sub> O <sub>18</sub>  | 946.5501   |                                 |
| 20  | malonyl-ginsenoside Rd               | C <sub>51</sub> H <sub>84</sub> O <sub>21</sub>  | 1032.5505  |                                 |
| 21  | notoginsenoside Fd                   | C <sub>47</sub> H <sub>80</sub> O <sub>17</sub>  | 916.5396   |                                 |
| 22  | ginsenoside Rd2                      | C <sub>47</sub> H <sub>80</sub> O <sub>17</sub>  | 916.5396   |                                 |
| 23  | ginsenoside Rc                       | C <sub>53</sub> H <sub>90</sub> O <sub>22</sub>  | 1078.5924  |                                 |
| 24* | ginsenoside Rb1                      | C <sub>54</sub> H <sub>92</sub> O <sub>23</sub>  | 1108.6029  |                                 |
| 25  | malonyl-ginsenoside Rc               | C <sub>56</sub> H <sub>92</sub> O <sub>25</sub>  | 1164.5928  |                                 |
| 26  | malonyl-ginsenoside Rb2              | C <sub>56</sub> H <sub>92</sub> O <sub>25</sub>  | 1164.5928  |                                 |
| 27  | malonyl-ginsenoside Rb1              | C <sub>57</sub> H <sub>94</sub> O <sub>26</sub>  | 1194.6033  |                                 |
| 28* | ginsenoside Ra1                      | C <sub>58</sub> H <sub>98</sub> O <sub>26</sub>  | 1210.6346  |                                 |
| 29  | ginsenoside Ra2                      | C <sub>58</sub> H <sub>98</sub> O <sub>26</sub>  | 1210.6346  |                                 |
| 30  | ginsenoside Ra3                      | C <sub>59</sub> H <sub>100</sub> O <sub>27</sub> | 1240.6452  |                                 |
| 31  | notoginsenoside R4                   | C <sub>59</sub> H <sub>100</sub> O <sub>27</sub> | 1240.6452  |                                 |
| 32* | notoginsenoside Fa                   | C <sub>59</sub> H <sub>100</sub> O <sub>28</sub> | 1240.6452  |                                 |
| 33  | notoginsenoside S                    | C <sub>63</sub> H <sub>106</sub> O <sub>30</sub> | 1342.6769  |                                 |
| 34* | ginsenoside Rb2                      | C <sub>53</sub> H <sub>90</sub> O <sub>22</sub>  | 1078.5924  |                                 |
| 35  | notoginsenoside Fc                   | C <sub>58</sub> H <sub>98</sub> O <sub>26</sub>  | 1210.6346  |                                 |
| 36  | ginsenoside Rb3                      | C <sub>53</sub> H <sub>90</sub> O <sub>22</sub>  | 1078.5924  |                                 |
| 37  | chikusetsusaponin IVa                | C <sub>42</sub> H <sub>66</sub> O <sub>14</sub>  | 794.4453   | <b>OA-type ginsenoside</b>      |
| 38* | chikusetsusaponin IV                 | C <sub>47</sub> H <sub>74</sub> O <sub>18</sub>  | 926.4875   |                                 |
| 39  | pseudoginsenoside Rt1                | C <sub>47</sub> H <sub>74</sub> O <sub>18</sub>  | 926.4875   |                                 |
| 40  | ginsenoside Ro                       | C <sub>48</sub> H <sub>76</sub> O <sub>19</sub>  | 956.4981   |                                 |
| 41  | 24( <i>R</i> )-pseudoginsenoside Rt5 | C <sub>36</sub> H <sub>62</sub> O <sub>10</sub>  | 654.4343   | <b>OT-type ginsenoside</b>      |

|     |                             |                                                 |           |                                   |
|-----|-----------------------------|-------------------------------------------------|-----------|-----------------------------------|
| 42  | 24(R)-pseudoginsenoside F11 | C <sub>42</sub> H <sub>72</sub> O <sub>14</sub> | 800.4922  |                                   |
| 43* | ginsenoside Rk3             | C <sub>36</sub> H <sub>60</sub> O <sub>8</sub>  | 620.4288  |                                   |
| 44* | astragaloside IV            | C <sub>41</sub> H <sub>68</sub> O <sub>14</sub> | 784.4609  |                                   |
| 45  | ginsenoside Rh7             | C <sub>36</sub> H <sub>60</sub> O <sub>9</sub>  | 636.4237  |                                   |
| 46  | ginsenoside Rh8             | C <sub>36</sub> H <sub>60</sub> O <sub>9</sub>  | 636.4237  |                                   |
| 47* | ginsenoside Rg5             | C <sub>42</sub> H <sub>70</sub> O <sub>12</sub> | 766.4868  |                                   |
| 48  | ginsenoside Rh3             | C <sub>36</sub> H <sub>60</sub> O <sub>7</sub>  | 604.4339  |                                   |
| 49  | ginsenoside Rg6             | C <sub>46</sub> H <sub>70</sub> O <sub>12</sub> | 766.4867  |                                   |
| 50* | ginsenoside F4              | C <sub>42</sub> H <sub>70</sub> O <sub>12</sub> | 766.4867  | <b>Other type<br/>ginsenoside</b> |
| 51* | ginsenoside Rh4             | C <sub>36</sub> H <sub>60</sub> O <sub>8</sub>  | 620.4288  |                                   |
| 52* | ginsenoside Rk1             | C <sub>42</sub> H <sub>70</sub> O <sub>12</sub> | 766.4867  |                                   |
| 53  | ginsenoside Rk2             | C <sub>36</sub> H <sub>60</sub> O <sub>7</sub>  | 604.4339  |                                   |
| 54  | 5,6-didehydroginsenoside Rd | C <sub>48</sub> H <sub>80</sub> O <sub>18</sub> | 944.5345  |                                   |
| 55  | vinaginsenoside R8          | C <sub>48</sub> H <sub>82</sub> O <sub>19</sub> | 962.5450  |                                   |
| 56  | gypenoside XLIX             | C <sub>52</sub> H <sub>86</sub> O <sub>21</sub> | 1046.5662 |                                   |
| 57  | pseudoginsenoside Rh2       | C <sub>36</sub> H <sub>62</sub> O <sub>8</sub>  | 622.4445  |                                   |
| 58  | caffeic acid                | C <sub>9</sub> H <sub>8</sub> O <sub>4</sub>    | 180.0423  | <b>Organic acid</b>               |
| 59  | vanillic acid               | C <sub>8</sub> H <sub>8</sub> O <sub>4</sub>    | 168.0423  |                                   |
| 60  | isoliquiritigenin           | C <sub>15</sub> H <sub>12</sub> O <sub>4</sub>  | 256.0736  |                                   |
| 61  | liquiritin                  | C <sub>21</sub> H <sub>22</sub> O <sub>9</sub>  | 418.1264  |                                   |
| 62  | liquiritigenin              | C <sub>15</sub> H <sub>12</sub> O <sub>4</sub>  | 256.0736  | <b>Flavonoid</b>                  |
| 63  | quercetin                   | C <sub>15</sub> H <sub>10</sub> O <sub>7</sub>  | 302.0427  |                                   |
| 64  | kaempferol                  | C <sub>15</sub> H <sub>10</sub> O <sub>6</sub>  | 286.0477  |                                   |
| 65  | nardosinone                 | C <sub>15</sub> H <sub>22</sub> O <sub>3</sub>  | 250.1569  |                                   |
| 66  | β-sitosterol                | C <sub>29</sub> H <sub>50</sub> O               | 414.3862  |                                   |
| 67* | lobetyolin                  | C <sub>20</sub> H <sub>28</sub> O <sub>8</sub>  | 396.1784  |                                   |
| 68* | atractylenolide III         | C <sub>15</sub> H <sub>20</sub> O <sub>3</sub>  | 248.1412  | <b>Other</b>                      |
| 69  | xanthotoxol                 | C <sub>11</sub> H <sub>6</sub> O <sub>4</sub>   | 202.0266  |                                   |
| 70* | syringin                    | C <sub>17</sub> H <sub>24</sub> O <sub>9</sub>  | 372.1420  |                                   |
| 71  | tangshenoside I             | C <sub>29</sub> H <sub>42</sub> O <sub>18</sub> | 678.2371  |                                   |

\* The compounds quantitatively assayed for WXG.



**Table S2.** Detailed information for the WXG samples analyzed in the current work.

| No. | Production batch | Specification (g/bag) | Sucrose | No. | Production batch | Specification (g/bag) | Sucrose | No. | Production batch | Specification (g/bag) | Sucrose |
|-----|------------------|-----------------------|---------|-----|------------------|-----------------------|---------|-----|------------------|-----------------------|---------|
| 1   | 1909023          | 9                     | T       | 10  | 2012027          | 9                     | T       | 19  | 2012027          | 5                     | F       |
| 2   | 2008021          | 9                     | T       | 11  | 2101037          | 9                     | T       | 20  | 2012074          | 5                     | F       |
| 3   | 2004071          | 9                     | T       | 12  | 2103003          | 9                     | T       | 21  | 2009083          | 5                     | F       |
| 4   | 2105016          | 9                     | T       | 13  | 2101038          | 9                     | T       | 22  | 2012079          | 5                     | F       |
| 5   | 2007015          | 9                     | T       | 14  | 2012028          | 9                     | T       | 23  | 2105033          | 5                     | F       |
| 6   | 2010013          | 9                     | T       | 15  | 2006008          | 5                     | F       | 24  | 2012069          | 5                     | F       |
| 7   | 2011068          | 9                     | T       | 16  | 2009018          | 5                     | F       | 25  | 2104057          | 5                     | F       |
| 8   | 2011067          | 9                     | T       | 17  | 2012030          | 5                     | F       | 26  | 2104041          | 5                     | F       |
| 9   | 2009035          | 9                     | T       | 18  | 2012029          | 5                     | F       | 27  | 2105001          | 5                     | F       |

T indicates that the WXG sample contains sucrose; F indicates that the WXG sample is free of sucrose.

**Table S3.** Detailed information for 20 candidate columns used in stationary phases screening.

| No. | Chromatographic Specification / column | Manufacturer                     | Separation characteristics                                                                                                                                                                                                                                                                |
|-----|----------------------------------------|----------------------------------|-------------------------------------------------------------------------------------------------------------------------------------------------------------------------------------------------------------------------------------------------------------------------------------------|
| 1   | HSS T3                                 | 2.1×100 mm, 1.8 $\mu$ m; Waters  | The universal, silica-based bonded phase used for the HSS T3 sorbents is compatible with 100% aqueous mobile phase and can enhance retention of polar molecules.                                                                                                                          |
| 2   | HSS C18 SB                             | 2.1×100 mm, 1.8 $\mu$ m; Waters  | HSS C18 SB column has the unique non-end-capped, low-coverage silica-based C18 chemistry, which is used for low pH separations that contain complex mixtures of basic and non-basic compounds.                                                                                            |
| 3   | CORTECS UPLC C18+                      | 2.1×100 mm, 1.6 $\mu$ m; Waters  | CORTECS C18 columns are general purpose, high-efficiency columns based on a solid-core particle that offer balanced retention of acids, bases and neutrals at low and mid-range pH.                                                                                                       |
| 4   | BEH Shield RP18                        | 2.1×100 mm, 1.7 $\mu$ m; Waters  | The embedded carbamate group in the bonded phase ligand provides alternate selectivity, especially for phenolic compounds compared to straight chain alkyl columns. This allows for alternate selectivity to that of alkyl reversed-phase columns and aqueous mobile phase compatibility. |
| 5   | CSH C18                                | 2.1×100 mm, 1.7 $\mu$ m; Waters  | Based on Ethylene Bridged Hybrid (BEH) particle technology, this column incorporates a low-level surface charge that has been designed to improve sample loadability and peak asymmetry, which is also the first choice for the analysis of peptides.                                     |
| 6   | CSH Phenyl-Hexyl                       | 2.1×100 mm, 1.7 $\mu$ m; Waters  | Built on the Charged Surface Hybrid (CSH) particle platform, this column offers exceptional peak shape under both low and high pH conditions while providing complementary selectivity for straight-chain alkyl phases, especially in polyaromatic compounds.                             |
| 7   | HSS Cynao                              | 2.1×100 mm, 1.8 $\mu$ m; Waters  | This chromatographic column has an ultra-performance general purpose propyl cyano bonded phase that could be used for normal- and reversed-phase separations.                                                                                                                             |
| 8   | CSH Fluoro-Phenyl                      | 2.1×100 mm, 1.7 $\mu$ m; Waters  | Designed to provide superior selectivity for positional isomers and polar compounds, the CSH Fluoro-Phenyl column utilizes an intricate combination of multiple retention mechanisms. The non-encapped sorbent can enhance the retention of acidic compounds.                             |
| 9   | ZORBAX Extend C18                      | 2.1×100 mm, 1.8 $\mu$ m; Agilent | The column incorporates a unique patented bidentate silane, combined with a double-endcapping process that protects the silica from dissolution at high pH, which also has good separations of peptides, polypeptides, and small proteins                                                 |

from pH 2–11.5.

|    |                             |                                     |                                                                                                                                                                                                                                           |
|----|-----------------------------|-------------------------------------|-------------------------------------------------------------------------------------------------------------------------------------------------------------------------------------------------------------------------------------------|
| 10 | ZORBAX Eclipse Plus C18     | 2.1×100 mm, 1.8 $\mu$ m; Agilent    | Filled with high-performance particulate C18 filler, this column could be used for the analysis of acidic and neutral samples, especially for the separation of alkaline compounds with poor peak shape on other chromatographic columns. |
| 11 | ZORBAX SB-Aq                | 2.1×100 mm, 1.8 $\mu$ m; Agilent    | This SB-Aq column has diisopropyl side-chain radical and is compatible with 100% pure water mobile phase, which can be used for high acid mobile phase.                                                                                   |
| 12 | Luna Omega Polar C18        | 2.1×100 mm, 1.6 $\mu$ m; Phenomenex | Based on silica, this C18 chromatographic column can improve the retention of polar and nonpolar compounds. And its C18 ligand can provide stable hydrophobicity in aqueous solution.                                                     |
| 13 | Kinetex Biphenyl            | 2.1×100 mm, 1.7 $\mu$ m; Phenomenex | With 100% water-soluble solvent stable reversed-phase stationary phase, this biphenyl chromatographic column has hydrophobic selectivity, aromatic selectivity and enhanced polar selectivity.                                            |
| 14 | Kinetex XB-C18              | 2.1×100 mm, 1.7 $\mu$ m; Phenomenex | As a phenyl shell core column, it is stable in 100% aqueous solution and can provide excellent reverse hydrophobic retention and polar selectivity to aromatic compounds.                                                                 |
| 15 | BEH C18                     | 2.1×100 mm, 1.7 $\mu$ m; Waters     | Built on the BEH particle platform, this column has the widest usable pH range (pH 1–12), which is ideal for the separation of medium or weak polar compounds.                                                                            |
| 16 | CORTECS UPLC Shield RP18    | 2.1×100 mm, 1.7 $\mu$ m; Waters     | The column utilizes an embedded carbamate group in the bonded phase ligand which provides alternate selectivity, especially for phenolic compounds compared to straight-chain alkyl columns.                                              |
| 17 | BEH C8                      | 2.1×100 mm, 1.7 $\mu$ m; Waters     | The trifunctionally bonded BEH particles offer the widest usable pH range (1–12), superior low pH stability, and ultra-low column bleed.                                                                                                  |
| 18 | Atlantis Premier BEH C18 AX | 2.1×100 mm, 1.7 $\mu$ m; Waters     | BEH C18 AX columns provide excellent retention for polar acidic analytes under reversed phase conditions and the reversed phase/anion-exchange mixed mode chemistry is stable from pH 2–10.                                               |
| 19 | Exsil Pure 100 C18          | 2.0×100 mm, 1.5 $\mu$ m; Exmere Ltd | This chromatographic column has ultra-pure silica bonded stationary phase which can provide superior results for difficult bases and chelates.                                                                                            |
| 20 | ZORBAX SB-C18               | 2.1×100 mm, 1.8 $\mu$ m; Agilent    | This SB-C18 column has diisobutyl side-chain radical and can provide the best stability under the condition of low pH mobile phase.                                                                                                       |

---

**Table S4.** Detailed information of the 205 components characterized from the WXG.

| No.             | Observed<br>$t_R$ (min) | Observed<br>$m/z$ | Molecular<br>Formula                                          | Mass error<br>(ppm) | Observed<br>CCS ( $\text{\AA}^2$ ) | Adducts | ESI-MS <sup>2</sup>                                                    | Identification                    | Type         | Source |
|-----------------|-------------------------|-------------------|---------------------------------------------------------------|---------------------|------------------------------------|---------|------------------------------------------------------------------------|-----------------------------------|--------------|--------|
| 1               | 0.82                    | 361.1638          | C <sub>20</sub> H <sub>24</sub> O <sub>6</sub>                | −2.0                | 178.74                             | +H      | 361.1331, 174.0755, 156.0646                                           | lariciresinol or its isomer       | other        | CP     |
| 2               | 0.97                    | 341.1078          | C <sub>12</sub> H <sub>22</sub> O <sub>11</sub>               | −3.2                | 270.32                             | −H      | 341.1076, 179.0548, 161.0441,<br>143.0337, 131.03455, 101.0235         | D-(+)-trehalose or its isomer     | other        | NJ     |
| 3               | 1.39                    | 341.1078          | C <sub>12</sub> H <sub>22</sub> O <sub>11</sub>               | −3.3                | 255.79                             | −H      | 323.0976, 179.0548, 161.0444,<br>143.0337, 113.0234, 101.0233, 89.0235 | D-(+)-trehalose or its isomer     | other        | NJ     |
| 4               | 2.46                    | 270.1325          | C <sub>13</sub> H <sub>19</sub> NO <sub>5</sub>               | −4.1                | 157.61                             | +H      | 270.1327, 252.1210, 209.0923,<br>177.0541, 137.0400                    | codonopsinol A or its isomer      | alkaloid     | CP     |
| 5               | 2.73                    | 284.1481          | C <sub>14</sub> H <sub>21</sub> NO <sub>5</sub>               | −4.1                | 161.76                             | +H      | 284.1479, 266.1376, 238.1226,<br>180.1011, 88.0735                     | codonopsinol or its isomer        | alkaloid     | CP     |
| 6               | 2.81                    | 268.1029          | C <sub>10</sub> H <sub>13</sub> N <sub>5</sub> O <sub>4</sub> | −4.3                | 153.53                             | +H      | 268.1041, 239.1020, 136.0602,<br>119.0336                              | hypoxanthine or its isomer        | alkaloid     | CP     |
| 7               | 4.73                    | 254.1375          | C <sub>13</sub> H <sub>19</sub> NO <sub>4</sub>               | −4.7                | 153.87                             | +H      | 254.1376, 161.0584, 150.0764                                           | codonopsinol B or its isomer      | alkaloid     | CP     |
| 8               | 4.75                    | 416.1908          | C <sub>19</sub> H <sub>29</sub> NO <sub>9</sub>               | −1.8                | 192.17                             | +H      | 416.1907, 254.1373, 236.1214,<br>161.0584                              | codonopiloside A or its isomer    | alkaloid     | CP     |
| 9               | 4.97                    | 268.1532          | C <sub>14</sub> H <sub>21</sub> NO <sub>4</sub>               | −4.3                | 157.29                             | +H      | 268.1535, 220.1335, 212.1020,<br>161.0587, 88.0737                     | codonopsine or its isomer         | alkaloid     | CP     |
| 10              | 5.28                    | 416.1907          | C <sub>19</sub> H <sub>29</sub> NO <sub>9</sub>               | −2.1                | 195.63                             | +H      | 254.1419                                                               | codonopiloside A or its isomer    | alkaloid     | CP     |
| 11              | 6.06                    | 353.0866          | C <sub>16</sub> H <sub>18</sub> O <sub>9</sub>                | −3.5                | 167.95                             | −H      | 191.0541, 179.0335, 135.0437                                           | chlorogenic acid or its isomer    | organic acid | NJ     |
| 12 <sup>a</sup> | 7.86                    | 417.1401          | C <sub>17</sub> H <sub>24</sub> O <sub>9</sub>                | −0.3                | 202.20                             | +HCOO   | 381.1753                                                               | Syringin                          | other        | CP     |
| 13              | 8.13                    | 353.0870          | C <sub>16</sub> H <sub>18</sub> O <sub>9</sub>                | −2.4                | 168.52                             | −H      | 191.0540, 179.0343, 173.0450,<br>135.0444, 93.0332                     | neochlorogenic acid or its isomer | organic acid | PS     |

|    |       |          |                                                               |      |        |    |                                                            |                     |                                                                                                                        |              |    |
|----|-------|----------|---------------------------------------------------------------|------|--------|----|------------------------------------------------------------|---------------------|------------------------------------------------------------------------------------------------------------------------|--------------|----|
| 14 | 9.64  | 287.1378 | C <sub>16</sub> H <sub>18</sub> N <sub>2</sub> O <sub>3</sub> | −4.3 | 163.42 | +H | 287.1376, 233.1052, 193.0757, 269.1272, 209.1071, 182.0826 | 251.1176, 207.0901, | 5-(9H- $\beta$ -carbolin-1-yl)-pentane-1,2,5-triol or its isomer                                                       | alkaloid     | PS |
| 16 | 11.94 | 535.1824 | C <sub>26</sub> H <sub>32</sub> O <sub>12</sub>               | 0.5  | 246.84 | −H | 373.1285, 343.1174                                         |                     | 8-hydroxypinoresinol-4'- <i>O</i> - $\beta$ -D-glucopyranoside or its isomer                                           | other        | PS |
| 15 | 11.94 | 697.2345 | C <sub>32</sub> H <sub>42</sub> O <sub>17</sub>               | −0.6 | 249.33 | −H | 373.1285, 343.1174                                         |                     | 8-hydroxypinoresinol-4- <i>O</i> -( $\beta$ -D-glucopyranosyl)-4'- <i>O</i> - $\beta$ -D-glucopyranoside or its isomer | other        | PS |
| 17 | 12.46 | 325.0916 | C <sub>15</sub> H <sub>18</sub> O <sub>8</sub>                | −3.8 | 169.35 | −H | 119.0494, 101.0376                                         |                     | ( <i>Z</i> )-2-( $\beta$ -glucopyranosyloxy)-3-phenylpropenoic acid or its isomer                                      | other        | CP |
| 18 | 12.90 | 357.1331 | C <sub>20</sub> H <sub>22</sub> O <sub>6</sub>                | −3.4 | 246.96 | −H | 151.0391, 136.0155                                         |                     | (+)-pinoresinol or its isomer                                                                                          | terpenoid    | PS |
| 19 | 12.90 | 519.1868 | C <sub>26</sub> H <sub>32</sub> O <sub>11</sub>               | −0.8 | 246.78 | −H | 357.1332, 151.0391, 136.0155                               |                     | pinoresinol-4- <i>O</i> - $\beta$ -D-glucopyranoside or its isomer                                                     | terpenoid    | PS |
| 20 | 12.90 | 681.2389 | C <sub>32</sub> H <sub>42</sub> O <sub>16</sub>               | −1.7 | 248.94 | −H | 357.1332, 151.0391, 136.0155                               |                     | (+)-pinoresinol <i>O</i> - $\beta$ -D-glucopyranosyl-(1→6)- $\beta$ -D-glucopyranoside or its isomer                   | terpenoid    | PS |
| 21 | 13.54 | 303.0485 | C <sub>15</sub> H <sub>10</sub> O <sub>7</sub>                | −4.8 | 160.53 | +H | 303.0487, 229.0507                                         |                     | quercetin or its isomer                                                                                                | flavonoid    | CP |
| 22 | 13.60 | 425.2018 | C <sub>18</sub> H <sub>34</sub> O <sub>11</sub>               | −2.5 | 209.20 | −H | 263.1493                                                   |                     | hexyl- $\beta$ -gentiobioside or its isomer                                                                            | other        | CP |
| 23 | 13.79 | 609.1456 | C <sub>27</sub> H <sub>30</sub> O <sub>16</sub>               | −0.9 | 228.64 | −H | 285.0307                                                   |                     | rutin hydrate or its isomer                                                                                            | flavonoid    | PN |
| 24 | 13.80 | 359.1337 | C <sub>16</sub> H <sub>24</sub> O <sub>9</sub>                | −2.9 | 180.10 | −H | 197.0808, 153.0904, 135.0806                               |                     | 7-deoxy-8-epi-loganic acid or its isomer                                                                               | organic acid | NJ |
| 25 | 13.92 | 579.2097 | C <sub>28</sub> H <sub>36</sub> O <sub>13</sub>               | 2.4  | 257.62 | −H | 417.1539                                                   |                     | (+)-syringaresinol- <i>O</i> - $\beta$ -D-glucopyranoside or its isomer                                                | terpenoid    | PS |
| 26 | 14.07 | 535.1813 | C <sub>26</sub> H <sub>32</sub> O <sub>12</sub>               | −1.4 | 224.44 | −H | 343.1181                                                   |                     | 8-hydroxypinoresinol-4'- <i>O</i> - $\beta$ -D-glucopyranoside or its isomer                                           | other        | NJ |

|    |       |           |                                                 |      |        |    |                                          |           |           |                                                                         |              |    |
|----|-------|-----------|-------------------------------------------------|------|--------|----|------------------------------------------|-----------|-----------|-------------------------------------------------------------------------|--------------|----|
| 27 | 14.10 | 350.1955  | C <sub>19</sub> H <sub>28</sub> NO <sub>5</sub> | -2.0 | 185.10 | -e | 350.1955,<br>121.0632                    | 250.1432, | 161.0583, | codonopyrrolidium A or its isomer                                       | alkaloid     | CP |
| 28 | 14.20 | 425.2014  | C <sub>18</sub> H <sub>34</sub> O <sub>11</sub> | -3.3 | 202.56 | -H | 425.2003,<br>113.0222, 101.0245          | 263.1467, | 161.0430, | hexyl- $\beta$ -gentiobioside or its isomer                             | other        | CP |
| 29 | 14.28 | 469.1342  | C <sub>21</sub> H <sub>26</sub> O <sub>12</sub> | -2.1 | 203.24 | -H | 265.0731, 163.0389, 161.0623             |           |           | tangshenoside V or its isomer                                           | other        | CP |
| 30 | 14.36 | 535.1828  | C <sub>26</sub> H <sub>32</sub> O <sub>12</sub> | 1.3  | 225.35 | -H | 343.1156                                 |           |           | 8-hydroxypinoresinol-4'- $O$ - $\beta$ -D-glucopyranoside or its isomer | other        | NJ |
| 31 | 14.93 | 521.2006  | C <sub>26</sub> H <sub>34</sub> O <sub>11</sub> | -4.3 | 224.26 | -H | 329.1349                                 |           |           | isolariciresinol 9'- $O$ - $\beta$ -D-glucopyranoside or its isomer     | terpenoid    | PS |
| 32 | 15.04 | 352.2110  | C <sub>19</sub> H <sub>30</sub> NO <sub>5</sub> | -2.4 | 182.83 | -e | 352.2101,<br>205.0843, 161.0580, 88.0733 | 250.1412, | 220.1319, | codotubulosine B or its isomer                                          | alkaloid     | CP |
| 33 | 15.26 | 352.2109  | C <sub>19</sub> H <sub>30</sub> NO <sub>5</sub> | -2.7 | 185.86 | -e | 352.2112,<br>205.0836, 161.0583, 88.0738 | 250.1437, | 220.1316, | codotubulosine B or its isomer                                          | alkaloid     | CP |
| 34 | 15.48 | 609.1454  | C <sub>27</sub> H <sub>30</sub> O <sub>16</sub> | -1.1 | 229.35 | -H | 609.1438,<br>300.0253, 271.0235          | 315.0485, | 314.0416, | rutin hydrate or its isomer                                             | flavonoid    | PN |
| 35 | 16.32 | 515.1180  | C <sub>25</sub> H <sub>24</sub> O <sub>12</sub> | -2.9 | 212.29 | -H | 353.0860,<br>173.0444                    | 191.0524, | 179.0318, | 1,5-di- $O$ -caffeoylquinic acid or its isomer                          | organic acid | NJ |
| 36 | 16.61 | 519.1866  | C <sub>26</sub> H <sub>32</sub> O <sub>11</sub> | -1.1 | 224.14 | -H | 357.1321                                 |           |           | pinoresinol-4- $O$ - $\beta$ -D-glucopyranoside or its isomer           | terpenoid    | NJ |
| 37 | 16.62 | 357.1328  | C <sub>20</sub> H <sub>22</sub> O <sub>6</sub>  | -4.3 | 202.72 | -H | 136.0143                                 |           |           | (+)-pinoresinol or its isomer                                           | terpenoid    | PS |
| 38 | 17.92 | 1093.5808 | C <sub>53</sub> H <sub>90</sub> O <sub>23</sub> | 0.7  | 328.13 | -H | 1093.5790, 961.5406                      |           |           | chikusetsusaponin LM5 or its isomer                                     | ginsenoside  | PN |
| 40 | 17.99 | 515.1195  | C <sub>25</sub> H <sub>24</sub> O <sub>12</sub> | 0.1  | 207.07 | -H | 353.0865, 179.0323, 135.0432             |           |           | 1,5-di- $O$ -caffeoylquinic acid or its isomer                          | organic acid | NJ |

|    |       |           |                                                 |      |        |       |                                |           |           |                                                                                                                                              |                   |    |
|----|-------|-----------|-------------------------------------------------|------|--------|-------|--------------------------------|-----------|-----------|----------------------------------------------------------------------------------------------------------------------------------------------|-------------------|----|
| 39 | 17.99 | 753.4072  | C <sub>39</sub> H <sub>60</sub> O <sub>14</sub> | 2.2  | 298.17 | +H    | 753.4084, 429.2994             | 591.3538, | 573.3427, | ophiopogonin C' or its isomer                                                                                                                | steroidal saponin | PS |
| 42 | 18.00 | 753.4079  | C <sub>39</sub> H <sub>60</sub> O <sub>14</sub> | 3.1  | 296.04 | +H    | 753.4110, 297.2173             | 591.3520, | 573.3420, | ophiopogonin C' or its isomer                                                                                                                | steroidal saponin | PS |
| 41 | 18.00 | 1077.5137 | C <sub>51</sub> H <sub>80</sub> O <sub>24</sub> | 2.3  | 313.91 | +H    | 1077.5126, 573.3427, 429.2994  | 753.4084, | 591.3538, | (25R)-spirost-5-en-12-one-3-O-β-D-glucopyranosyl-(1→2)-β-D-glucopyranosyl-(1→3)-β-D-glucopyranosyl-(1→4)-β-D-galactopyranoside or its isomer | steroidal saponin | PS |
| 43 | 18.38 | 1139.5880 | C <sub>53</sub> H <sub>90</sub> O <sub>23</sub> | 2.2  | 336.00 | +HCOO | 1093.5832, 961.5382            |           |           | chikusetsusaponin LM5 or its isomer                                                                                                          | ginsenoside       | PN |
| 44 | 18.39 | 373.1289  | C <sub>20</sub> H <sub>22</sub> O <sub>7</sub>  | -1.1 | 190.23 | -H    | 313.1036, 269.0784             |           |           | (+)-1-hydroxypinoresinol or its isomer                                                                                                       | other             | NJ |
| 45 | 18.41 | 1225.5495 | C <sub>56</sub> H <sub>90</sub> O <sub>29</sub> | 0.0  | 350.19 | -H    | 1225.5490, 1093.5832, 961.5382 |           |           | chikusetsusaponin LM6 or its isomer                                                                                                          | ginsenoside       | PN |
| 46 | 18.48 | 753.4079  | C <sub>39</sub> H <sub>60</sub> O <sub>14</sub> | 3.1  | 297.83 | +H    | 753.4089, 591.3530, 429.2987   |           |           | ophiopogonin C' or its isomer                                                                                                                | steroidal saponin | PS |
| 47 | 18.49 | 1047.5031 | C <sub>50</sub> H <sub>78</sub> O <sub>23</sub> | 2.3  | 313.35 | +H    | 1047.5060, 429.2987            | 753.4089, | 591.3530, | spirost-5-en-12-one-3-O-β-D-glucopyranosyl-(1→2)-[β-D-xylopyranosyl-(1→3)]-β-D-glucopyranosyl-(1→4)-β-D-galactopyranoside or its isomer      | steroidal saponin | PS |
| 49 | 18.50 | 753.4073  | C <sub>39</sub> H <sub>60</sub> O <sub>14</sub> | 2.3  | 297.60 | +H    | 753.4123, 591.3519             |           |           | ophiopogonin C' or its isomer                                                                                                                | steroidal saponin | PS |
| 48 | 18.50 | 1063.4963 | C <sub>50</sub> H <sub>80</sub> O <sub>24</sub> | -0.3 | 318.24 | -H    | 1063.4974, 931.4547            |           |           | sibiricogenin 3-O-β-lycotetraoside or its isomer                                                                                             | other             | NJ |



|                 |       |           |                                                 |      |        |       |                                         |                                                                                                                                                                                                                            |                   |    |
|-----------------|-------|-----------|-------------------------------------------------|------|--------|-------|-----------------------------------------|----------------------------------------------------------------------------------------------------------------------------------------------------------------------------------------------------------------------------|-------------------|----|
| 50              | 18.51 | 915.4580  | C <sub>45</sub> H <sub>70</sub> O <sub>19</sub> | −0.5 | 296.44 | +H    | 753.4089, 591.3530, 429.2987            | (25S)-pratioside D1 or its isomer                                                                                                                                                                                          | steroidal saponin | PS |
| 51 <sup>a</sup> | 18.56 | 395.1695  | C <sub>20</sub> H <sub>28</sub> O <sub>8</sub>  | −4.0 | 216.17 | −H    | 484.0590                                | lobetyolin                                                                                                                                                                                                                 | other             | CP |
| 52              | 18.66 | 961.5369  | C <sub>48</sub> H <sub>82</sub> O <sub>19</sub> | −0.8 | 312.84 | −H    | 961.5362, 799.4862, 637.4317, 475.3796  | floralginsenoside La (24 $\alpha$ ) or its isomer                                                                                                                                                                          | ginsenoside       | PN |
| 54              | 18.70 | 753.4068  | C <sub>39</sub> H <sub>60</sub> O <sub>14</sub> | 1.5  | 298.57 | +H    | 753.4074, 591.3537, 429.3001            | (25S)-kingianoside A or its isomer                                                                                                                                                                                         | steroidal saponin | PS |
| 53              | 18.70 | 1047.5021 | C <sub>50</sub> H <sub>78</sub> O <sub>23</sub> | 1.3  | 309.69 | +H    | 915.4616, 753.4074, 591.3537, 429.3001  | spirost-5-en-12-one-3- <i>O</i> - $\beta$ -D-glucopyranosyl-(1 $\rightarrow$ 2)-[ $\beta$ -D-xylopyranosyl-(1 $\rightarrow$ 3)]- $\beta$ -D-glucopyranosyl-(1 $\rightarrow$ 4)- $\beta$ -D-galactopyranoside or its isomer | steroidal saponin | PS |
| 55              | 18.71 | 1063.4965 | C <sub>50</sub> H <sub>80</sub> O <sub>24</sub> | −0.2 | 316.80 | −H    | 931.4524, 799.4862, 637.4317, 475.3796  | PPT-2Glc-2Xyl or its isomer                                                                                                                                                                                                | ginsenoside       | PN |
| 56              | 18.73 | 915.4604  | C <sub>45</sub> H <sub>70</sub> O <sub>19</sub> | 2.2  | 294.56 | +H    | 915.4616, 753.4074, 591.3537, 429.3001  | (25S)-pratioside D1 or its isomer                                                                                                                                                                                          | steroidal saponin | PS |
| 57              | 18.74 | 931.4532  | C <sub>45</sub> H <sub>72</sub> O <sub>20</sub> | −1.3 | 301.83 | −H    | 931.4524, 769.4029, 751.3830            | kingianoside C or its isomer                                                                                                                                                                                               | steroidal saponin | PS |
| 58              | 18.79 | 1139.5855 | C <sub>53</sub> H <sub>90</sub> O <sub>23</sub> | 0.0  | 339.35 | +HCOO | 1093.5798, 931.5321                     | floralginsenoside P or its isomer                                                                                                                                                                                          | ginsenoside       | PN |
| 61              | 18.89 | 753.4075  | C <sub>39</sub> H <sub>60</sub> O <sub>14</sub> | 2.5  | 298.70 | +H    | 753.4087, 591.3524, 429.2997            | (25S)-kingianoside A or its isomer                                                                                                                                                                                         | steroidal saponin | PS |
| 62              | 18.89 | 1047.5054 | C <sub>50</sub> H <sub>78</sub> O <sub>23</sub> | 4.5  | 307.22 | +H    | 1047.5086, 753.4087, 591.3524, 429.2997 | spirost-5-en-12-one-3- <i>O</i> - $\beta$ -D-glucopyranosyl-(1 $\rightarrow$ 2)-[ $\beta$ -D-xylopyranosyl-(1 $\rightarrow$ 3)]- $\beta$ -D-glucopyranosyl-(1 $\rightarrow$ 4)- $\beta$ -D-galactopyranoside or its isomer | steroidal saponin | PS |

|                 |       |           |                                                 |      |        |       |                                        |                                                                                        |                   |    |
|-----------------|-------|-----------|-------------------------------------------------|------|--------|-------|----------------------------------------|----------------------------------------------------------------------------------------|-------------------|----|
| 60              | 18.89 | 1063.4989 | C <sub>50</sub> H <sub>80</sub> O <sub>24</sub> | 2.1  | 318.55 | –H    | 1063.4979, 931.4534                    | sibiricogenin 3- <i>O</i> - $\beta$ -lycotetraoside or its isomer                      | other             | NJ |
| 59              | 18.89 | 1225.5507 | C <sub>56</sub> H <sub>90</sub> O <sub>29</sub> | 1.0  | 354.55 | –H    | 1063.4979, 931.4534                    | chikusetsusaponin LM6 or its isomer                                                    | ginsenoside       | PN |
| 63              | 18.91 | 1063.4982 | C <sub>50</sub> H <sub>80</sub> O <sub>24</sub> | 1.4  | 318.23 | –H    | 1063.4984, 931.4565                    | sibiricogenin 3- <i>O</i> - $\beta$ -lycotetraoside or its isomer                      | other             | NJ |
| 64              | 18.96 | 235.1329  | C <sub>14</sub> H <sub>20</sub> O <sub>3</sub>  | –4.6 | 158.18 | –H    | 191.1440                               | tetradeca-4 <i>E</i> ,8 <i>E</i> ,12 <i>E</i> -triene-10-yne-1,6,7-triol or its isomer | other             | CP |
| 65              | 19.12 | 833.4916  | C <sub>41</sub> H <sub>72</sub> O <sub>14</sub> | 1.4  | 282.12 | +HCOO | 787.4845, 493.3900                     | OT+2H-Xyl-Glc                                                                          | ginsenoside       | PN |
| 66              | 19.49 | 831.4738  | C <sub>41</sub> H <sub>70</sub> O <sub>14</sub> | –1.1 | 283.45 | +HCOO | 785.4710, 653.4335, 491.3745           | pseudoginsenoside Rt2 (24 <i>R</i> ) or its isomer                                     | ginsenoside       | PN |
| 67              | 19.67 | 284.1268  | C <sub>17</sub> H <sub>17</sub> NO <sub>3</sub> | –4.7 | 169.42 | +H    | 147.0428, 119.0486                     | N-trans-p-coumaroyltyramine or its isomer                                              | alkaloid          | PS |
| 68              | 19.76 | 961.5371  | C <sub>48</sub> H <sub>82</sub> O <sub>19</sub> | –0.7 | 319.34 | –H    | 961.5365, 799.4846, 637.4315, 475.3783 | ginsenoside Re1 or its isomer                                                          | ginsenoside       | PN |
| 69              | 19.77 | 769.4022  | C <sub>39</sub> H <sub>62</sub> O <sub>15</sub> | 0.8  | 276.22 | –H    | 769.4029, 637.4315, 475.3783           | chikusetsusaponin LM1 or its isomer                                                    | ginsenoside       | PN |
| 70              | 19.79 | 931.4539  | C <sub>45</sub> H <sub>72</sub> O <sub>20</sub> | –0.5 | 296.29 | –H    | 799.4846, 637.4315, 475.3783           | kingianoside C or its isomer                                                           | steroidal saponin | PS |
| 71              | 19.92 | 755.4222  | C <sub>39</sub> H <sub>62</sub> O <sub>14</sub> | 1.3  | 277.81 | +H    | 755.4196, 593.3722, 269.1897           | huangjinoside E or its isomer                                                          | steroidal saponin | PS |
| 72 <sup>a</sup> | 20.39 | 977.5326  | C <sub>47</sub> H <sub>80</sub> O <sub>18</sub> | –0.1 | 320.21 | +HCOO | 931.5261, 799.4834, 637.4312, 475.3772 | notoginsenoside R1                                                                     | ginsenoside       | PN |
| 73              | 20.68 | 314.1379  | C <sub>18</sub> H <sub>19</sub> NO <sub>4</sub> | –2.5 | 179.07 | +H    | 314.2197, 177.0538, 145.0273           | 3-(4-hydroxy)-N-[2-(4-hydroxyphenyl)-2-methoxyethyl]-2-propenamide or its isomer       | alkaloid          | PS |

|                 |       |           |                                                               |      |        |       |                                         |                     |                                                                                                                                                                      |                   |    |
|-----------------|-------|-----------|---------------------------------------------------------------|------|--------|-------|-----------------------------------------|---------------------|----------------------------------------------------------------------------------------------------------------------------------------------------------------------|-------------------|----|
| 74              | 20.88 | 977.5321  | C <sub>47</sub> H <sub>80</sub> O <sub>18</sub>               | −0.6 | 316.44 | +HCOO | 931.5254, 475.3780                      | 799.4847, 637.4319, | notoginsenoside Fp1 or its isomer                                                                                                                                    | ginsenoside       | PN |
| 75              | 21.42 | 637.4326  | C <sub>36</sub> H <sub>62</sub> O <sub>9</sub>                | 0.8  | 265.71 | −H    | 637.4316, 179.0543, 161.0441            | 475.3787, 391.2841, | 3- <i>O</i> -β-D-glucopyranosyl-20( <i>S</i> )-protopanaxatriol or its isomer                                                                                        | ginsenoside       | PN |
| 76 <sup>a</sup> | 21.42 | 799.4854  | C <sub>42</sub> H <sub>72</sub> O <sub>14</sub>               | 0.6  | 288.21 | −H    | 845.4896, 475.3887, 391.2841, 161.0441  | 799.4843, 637.4316, | ginsenoside Rg1                                                                                                                                                      | ginsenoside       | PN |
| 77 <sup>a</sup> | 21.50 | 945.5431  | C <sub>48</sub> H <sub>82</sub> O <sub>18</sub>               | 0.3  | 321.25 | −H    | 945.5421, 457.3688, 161.0441            | 783.4895, 621.4306, | ginsenoside Re                                                                                                                                                       | ginsenoside       | PN |
| 78              | 21.86 | 461.2018  | C <sub>21</sub> H <sub>34</sub> O <sub>11</sub>               | −2.2 | 206.03 | −H    | 461.2034, 347.1719                      |                     | urceolide or its isomer                                                                                                                                              | other             | NJ |
| 79              | 21.88 | 309.0859  | C <sub>17</sub> H <sub>12</sub> N <sub>2</sub> O <sub>4</sub> | −3.4 | 166.01 | +H    | 291.0760, 206.0823, 180.0797            | 263.0802, 235.0853, | flazine or its isomer                                                                                                                                                | alkaloid          | PS |
| 80              | 22.13 | 285.0747  | C <sub>16</sub> H <sub>12</sub> O <sub>5</sub>                | −3.7 | 158.14 | +H    | 283.0614, 268.0357                      |                     | acacetin or its isomer                                                                                                                                               | flavonoid         | PS |
| 81              | 22.17 | 591.1729  | C <sub>28</sub> H <sub>32</sub> O <sub>14</sub>               | 1.7  | 240.08 | −H    | 283.0614, 268.0357                      |                     | acaciin, acacetin-7- <i>O</i> -rutinosid, buddleoside, linarine or its isomer                                                                                        | flavonoid         | PS |
| 82              | 22.17 | 931.4538  | C <sub>45</sub> H <sub>72</sub> O <sub>20</sub>               | −0.7 | 287.93 | −H    | 931.5249, 799.4834, 637.4342,           |                     | kingianoside C or its isomer                                                                                                                                         | steroidal saponin | PS |
| 83              | 22.57 | 841.4959  | C <sub>44</sub> H <sub>74</sub> O <sub>15</sub>               | 0.5  | 293.34 | −H    | 841.4942, 637.4343, 619.4196, 475.3790  | 799.4855, 781.4729, | 6'- <i>O</i> -acetyl-ginsenoside Rg1 or its isomer                                                                                                                   | ginsenoside       | PN |
| 84              | 22.60 | 1123.5921 | C <sub>54</sub> H <sub>92</sub> O <sub>24</sub>               | 1.3  | 220.65 | −H    | 1123.5905, 637.4343, 619.4196, 475.3790 | 961.5432, 799.4855, | 6- <i>O</i> -[β-D-glucopyranosyl-(1→2)-β-D-glucopyranosyl]-20- <i>O</i> -[β-D-glucopyranosyl-(1→4)-β-D-glucopyranosyl]-20( <i>S</i> )-protopanaxatriol or its isomer | ginsenoside       | PN |
| 85              | 22.85 | 979.5511  | C <sub>48</sub> H <sub>84</sub> O <sub>20</sub>               | 2.9  | 202.70 | −H    | 979.5488, 799.4864, 475.3806            |                     | vinaginsenoside R13 or its isomer                                                                                                                                    | ginsenoside       | PN |
| 86              | 22.88 | 947.5236  | C <sub>46</sub> H <sub>78</sub> O <sub>17</sub>               | 1.6  | 312.16 | +HCOO | 901.5166, 475.3754                      | 769.4731, 607.4235, | chikusetsusaponin LM2 or its isomer                                                                                                                                  | ginsenoside       | PN |

|    |       |           |                                                 |      |        |       |                                                  |                                                                                                                                                                        |                   |    |
|----|-------|-----------|-------------------------------------------------|------|--------|-------|--------------------------------------------------|------------------------------------------------------------------------------------------------------------------------------------------------------------------------|-------------------|----|
| 88 | 23.05 | 577.3738  | C <sub>33</sub> H <sub>52</sub> O <sub>8</sub>  | 0.6  | 248.48 | +H    | 577.3738, 415.3213, 253.1953                     | trillin or its isomer                                                                                                                                                  | steroidal saponin | PS |
| 87 | 23.05 | 739.4276  | C <sub>39</sub> H <sub>62</sub> O <sub>13</sub> | 1.7  | 298.59 | +H    | 739.4288, 591.3542, 577.3738, 415.3213, 253.1953 | funkioside C or its isomer                                                                                                                                             | steroidal saponin | PS |
| 89 | 23.26 | 753.4072  | C <sub>39</sub> H <sub>60</sub> O <sub>14</sub> | 2.2  | 301.42 | +H    | 591.3533                                         | ophiopogonin C' or its isomer                                                                                                                                          | steroidal saponin | PS |
| 90 | 23.28 | 1075.4961 | C <sub>51</sub> H <sub>80</sub> O <sub>24</sub> | -0.5 | 310.38 | -H    | 1075.4963, 913.4403                              | (25 <i>R</i> )-spirost-5-en-3β,17α-diol-3- <i>O</i> -α-L-rhamnopyranosyl-(1→4)-α-L-rhamnopyranosyl-(1→4)-[α-L-rhamnopyranosyl-(1→2)]-β-D-glucopyranoside or its isomer | steroidal saponin | PS |
| 92 | 23.30 | 739.4286  | C <sub>39</sub> H <sub>62</sub> O <sub>13</sub> | 3.0  | 300.14 | +H    | 739.4256, 591.3532, 577.3753, 253.1950           | funkioside C or its isomer                                                                                                                                             | steroidal saponin | PS |
| 91 | 23.30 | 947.5236  | C <sub>46</sub> H <sub>78</sub> O <sub>17</sub> | 1.6  | 315.06 | +HCOO | 901.5136, 637.4331, 755.4212, 475.3819           | chikusetsusaponin L5 or its isomer                                                                                                                                     | ginsenoside       | PN |
| 93 | 23.54 | 841.4951  | C <sub>44</sub> H <sub>74</sub> O <sub>15</sub> | -0.4 | 298.47 | -H    | 783.3796, 637.4317, 619.4212, 475.3807           | 6'- <i>O</i> -acetyl-ginsenoside Rg1 or its isomer                                                                                                                     | ginsenoside       | PN |
| 94 | 23.59 | 815.4784  | C <sub>41</sub> H <sub>70</sub> O <sub>13</sub> | -1.8 | 290.08 | +HCOO | 769.4753, 607.4209, 475.3807                     | chikusetsusaponin LM1 or its isomer                                                                                                                                    | ginsenoside       | PN |
| 95 | 23.61 | 285.0754  | C <sub>16</sub> H <sub>12</sub> O <sub>5</sub>  | -1.2 | 203.15 | +H    | 285.0752, 270.0516                               | acacetin or its isomer                                                                                                                                                 | flavonoid         | PS |
| 96 | 23.62 | 739.4270  | C <sub>39</sub> H <sub>62</sub> O <sub>13</sub> | 0.9  | 300.51 | +H    | 739.4283, 577.3741                               | funkioside C or its isomer                                                                                                                                             | steroidal saponin | PS |
| 97 | 23.63 | 283.0601  | C <sub>16</sub> H <sub>12</sub> O <sub>5</sub>  | -3.8 | 206.23 | -H    | 268.0365                                         | acacetin or its isomer                                                                                                                                                 | flavonoid         | PS |
| 98 | 23.64 | 959.5208  | C <sub>48</sub> H <sub>80</sub> O <sub>19</sub> | -1.4 | 326.86 | -H    | 959.5202, 797.4682, 635.4166, 473.3633           | ginsenoside III or its isomer                                                                                                                                          | ginsenoside       | PN |

|     |       |           |                                                 |     |        |    |                                                                        |                                                                                                                                                                                                                                                  |                   |    |
|-----|-------|-----------|-------------------------------------------------|-----|--------|----|------------------------------------------------------------------------|--------------------------------------------------------------------------------------------------------------------------------------------------------------------------------------------------------------------------------------------------|-------------------|----|
| 99  | 23.64 | 1033.5232 | C <sub>50</sub> H <sub>80</sub> O <sub>22</sub> | 1.7 | 317.11 | +H | 1033.5253, 739.4283, 577.3741                                          | spirost-5-en-3 $\beta$ ,14 $\alpha$ -diol-3- <i>O</i> - $\beta$ -D-glucopyranosyl-(1 $\rightarrow$ 2)-[ $\beta$ -D-xylopyranosyl-(1 $\rightarrow$ 3)]- $\beta$ -D-glucopyranosyl-(1 $\rightarrow$ 4)- $\beta$ -D-galactopyranoside or its isomer | steroidal saponin | PS |
| 101 | 23.83 | 871.4720  | C <sub>44</sub> H <sub>70</sub> O <sub>17</sub> | 4.0 | 339.80 | +H | 871.4724, 709.4168, 577.3743, 415.3205, 253.1945                       | polygonatoside C1 or its isomer                                                                                                                                                                                                                  | steroidal saponin | PS |
| 100 | 23.83 | 885.4859  | C <sub>45</sub> H <sub>72</sub> O <sub>17</sub> | 1.9 | 309.55 | +H | 885.4870, 739.4279, 577.3743, 415.3205, 253.1945                       | gracillin or its isomer                                                                                                                                                                                                                          | steroidal saponin | PS |
| 102 | 23.84 | 739.4283  | C <sub>39</sub> H <sub>62</sub> O <sub>13</sub> | 2.7 | 299.20 | +H | 739.4279, 577.3743, 415.3205, 253.1945                                 | funkioside C or its isomer                                                                                                                                                                                                                       | steroidal saponin | PS |
| 103 | 23.84 | 1163.5885 | C <sub>56</sub> H <sub>90</sub> O <sub>25</sub> | 3.5 | 342.10 | +H | 1163.5879, 1001.5364, 869.4925, 723.4334, 577.3745, 415.3195, 253.1966 | C <sub>27</sub> H <sub>42</sub> O <sub>3</sub> -2Glc-2Rha-Xyl                                                                                                                                                                                    | ginsenoside       | PN |
| 104 | 23.85 | 577.3744  | C <sub>33</sub> H <sub>52</sub> O <sub>8</sub>  | 1.5 | 247.73 | +H | 577.3743, 415.3205, 253.1945                                           | trillin or its isomer                                                                                                                                                                                                                            | steroidal saponin | PS |
| 105 | 23.94 | 901.4825  | C <sub>45</sub> H <sub>72</sub> O <sub>18</sub> | 3.7 | 295.51 | +H | 901.4824, 739.4289, 577.3744, 415.3210, 397.3092, 271.2052, 253.1940   | neosibiricoside D or its isomer                                                                                                                                                                                                                  | steroidal saponin | PS |
| 106 | 24.02 | 1031.5080 | C <sub>50</sub> H <sub>80</sub> O <sub>22</sub> | 1.1 | 330.71 | -H | 1031.5066, 899.4628, 637.4302                                          | spirost-5-en-3 $\beta$ ,14 $\alpha$ -diol-3- <i>O</i> - $\beta$ -D-glucopyranosyl-(1 $\rightarrow$ 2)-[ $\beta$ -D-xylopyranosyl-(1 $\rightarrow$ 3)]- $\beta$ -D-glucopyranosyl-(1 $\rightarrow$ 4)- $\beta$ -D-galactopyranoside or its isomer | steroidal saponin | PS |
| 107 | 24.39 | 1031.5451 | C <sub>51</sub> H <sub>82</sub> O <sub>21</sub> | 2.9 | 356.60 | +H | 1031.5429, 869.4905, 723.4392, 577.3690, 415.3200, 253.1938            | C <sub>27</sub> H <sub>42</sub> O <sub>3</sub> -2Glc-2Rha                                                                                                                                                                                        | ginsenoside       | PN |

|     |       |           |                                                 |      |        |       |                                                                       |                                                              |                   |    |
|-----|-------|-----------|-------------------------------------------------|------|--------|-------|-----------------------------------------------------------------------|--------------------------------------------------------------|-------------------|----|
| 108 | 24.41 | 961.5380  | C <sub>47</sub> H <sub>80</sub> O <sub>17</sub> | 0.2  | 318.64 | +HCOO | 915.5312, 783.4898, 475.3771                                          | vinaginsenoside R18 or its isomer                            | ginsenoside       | PN |
| 111 | 24.49 | 577.3740  | C <sub>33</sub> H <sub>52</sub> O <sub>8</sub>  | 0.8  | 249.99 | +H    | 577.3739, 415.3201, 253.1943                                          | trillin or its isomer                                        | steroidal saponin | PS |
| 110 | 24.49 | 739.4285  | C <sub>39</sub> H <sub>62</sub> O <sub>13</sub> | 3.0  | 301.43 | +H    | 739.4282, 577.3739, 415.3201, 253.1943                                | funkioside C or its isomer                                   | steroidal saponin | PS |
| 109 | 24.49 | 871.4715  | C <sub>44</sub> H <sub>70</sub> O <sub>17</sub> | 3.4  | 295.99 | +H    | 871.4704, 739.4282, 577.3739, 415.3201, 253.1943, 157.1006            | polygonatoside C1 or its isomer                              | steroidal saponin | PS |
| 112 | 24.53 | 1017.5304 | C <sub>50</sub> H <sub>80</sub> O <sub>21</sub> | 3.8  | 353.14 | +H    | 1017.5295, 855.4759, 723.4309, 577.3751, 415.3201, 271.2054, 253.1938 | C <sub>27</sub> H <sub>42</sub> O <sub>3</sub> -2Glc-Rha-Xyl | ginsenoside       | PN |
| 113 | 24.55 | 815.4792  | C <sub>41</sub> H <sub>70</sub> O <sub>13</sub> | -0.8 | 293.64 | +HCOO | 815.4796, 769.4745, 637.4321, 475.3795                                | chikusetsusaponin LM1 or its isomer                          | ginsenoside       | PN |
| 114 | 24.83 | 885.4866  | C <sub>45</sub> H <sub>72</sub> O <sub>17</sub> | 2.7  | 314.49 | +H    | 885.4867, 723.4326, 579.3170, 577.3739, 415.3180, 271.2049, 253.1950  | gracillin or its isomer                                      | steroidal saponin | PS |
| 115 | 24.93 | 1047.5388 | C <sub>51</sub> H <sub>82</sub> O <sub>22</sub> | 1.7  | 316.98 | +H    | 885.4860, 739.4276, 723.4323, 577.3735, 415.3200, 253.1941            | parissaponin Pb or its isomer                                | steroidal saponin | PS |
| 117 | 24.96 | 577.3737  | C <sub>33</sub> H <sub>52</sub> O <sub>8</sub>  | 0.4  | 247.81 | +H    | 577.3535, 415.3200, 253.1941                                          | trillin or its isomer                                        | steroidal saponin | PS |
| 116 | 24.96 | 739.4278  | C <sub>39</sub> H <sub>62</sub> O <sub>13</sub> | 2.0  | 298.80 | +H    | 739.4276, 577.3735, 415.3200, 253.1941                                | funkioside C or its isomer                                   | steroidal saponin | PS |
| 118 | 24.97 | 885.4865  | C <sub>45</sub> H <sub>72</sub> O <sub>17</sub> | 2.6  | 311.31 | +H    | 885.4860, 723.4323, 577.3735, 415.3200, 253.1941                      | gracillin or its isomer                                      | steroidal saponin | PS |
| 119 | 25.70 | 961.5385  | C <sub>48</sub> H <sub>82</sub> O <sub>19</sub> | 0.8  | 328.11 | -H    | 961.5367, 799.4842, 637.4323, 475.3800                                | notoginsenoside R3 or its isomer                             | ginsenoside       | PN |

|                  |       |           |                                                  |      |        |       |                                                               |                                                             |                   |    |
|------------------|-------|-----------|--------------------------------------------------|------|--------|-------|---------------------------------------------------------------|-------------------------------------------------------------|-------------------|----|
| 120              | 25.79 | 219.1735  | C <sub>15</sub> H <sub>22</sub> O                | -3.9 | 151.26 | +H    | 219.1731, 203.1422                                            | (-)-(14β,15β)-aristolone or its isomer                      | other             | NJ |
| 121              | 26.14 | 827.4786  | C <sub>42</sub> H <sub>70</sub> O <sub>13</sub>  | -1.5 | 303.18 | +HCOO | 827.4760, 781.4737, 619.4212                                  | ginsenoside Rh15 or its isomer                              | ginsenoside       | PN |
| 122              | 26.17 | 913.4429  | C <sub>45</sub> H <sub>70</sub> O <sub>19</sub>  | -1.0 | 293.92 | +HCOO | 867.4353, 721.3801                                            | (25S)-pratioidide D1 or its isomer                          | steroidal saponin | PS |
| 123              | 26.25 | 929.4366  | C <sub>45</sub> H <sub>70</sub> O <sub>20</sub>  | -2.3 | 299.05 | -H    | 929.4389, 767.3845                                            | vinaginsenoside R3 or its isomer                            | ginsenoside       | PN |
| 124              | 26.65 | 931.4539  | C <sub>45</sub> H <sub>72</sub> O <sub>20</sub>  | -0.6 | 304.96 | -H    | 931.4533, 769.3995                                            | kingianoside C or its isomer                                | steroidal saponin | PS |
| 125              | 26.85 | 327.2162  | C <sub>18</sub> H <sub>32</sub> O <sub>5</sub>   | -4.7 | 180.26 | -H    | 327.2196, 229.1445, 211.1330, 171.1018                        | 9,12,13-trihydroxy-10,15-octadecadienoic acid or its isomer | organic acid      | CP |
| 126              | 26.92 | 869.4540  | C <sub>44</sub> H <sub>70</sub> O <sub>17</sub>  | 0.0  | 290.94 | -H    | 869.4546, 723.3958                                            | polygonatoside C1 or its isomer                             | steroidal saponin | PS |
| 128              | 27.21 | 769.4024  | C <sub>39</sub> H <sub>62</sub> O <sub>15</sub>  | 1.1  | 273.07 | -H    | 637.4320, 475.3798, 391.2860                                  | chikusetsusaponin LM1 or its isomer                         | ginsenoside       | PN |
| 127              | 27.21 | 1077.5126 | C <sub>51</sub> H <sub>82</sub> O <sub>24</sub>  | 0.3  | 366.80 | -H    | 799.4849, 637.4320, 475.3798, 391.2860                        | floralginsenoside M or its isomer                           | ginsenoside       | PN |
| 129 <sup>a</sup> | 27.23 | 799.4854  | C <sub>42</sub> H <sub>72</sub> O <sub>14</sub>  | 0.5  | 303.56 | -H    | 799.4849, 637.4320, 475.3798, 391.2860                        | ginsenoside Rf                                              | ginsenoside       | PN |
| 130              | 27.49 | 1371.6807 | C <sub>64</sub> H <sub>108</sub> O <sub>31</sub> | 0.4  | 391.70 | -H    | 1371.6809, 1239.6395, 1107.5988, 945.5421, 783.4893, 619,3137 | notoginsenoside T or its isomer                             | ginsenoside       | PN |
| 131              | 27.81 | 913.5164  | C <sub>46</sub> H <sub>76</sub> O <sub>15</sub>  | -0.3 | 299.90 | +HCOO | 913.5251, 867.5154, 799.4831, 781.4712, 637.4236              | koryoginsenoside R1 or its isomer                           | ginsenoside       | PN |
| 132              | 28.37 | 799.4847  | C <sub>42</sub> H <sub>72</sub> O <sub>14</sub>  | -0.2 | 295.98 | -H    | 799.4838, 475.3790                                            | notoginsenoside U or its isomer                             | ginsenoside       | PN |
| 134 <sup>a</sup> | 28.71 | 815.4796  | C <sub>41</sub> H <sub>70</sub> O <sub>13</sub>  | -0.3 | 296.60 | +HCOO | 769.4738, 637.4315, 475.3785, 391.2843, 161.0439              | notoginsenoside R2                                          | ginsenoside       | PN |



|                  |       |           |                                                  |      |        |       |                                                                 |                                                                        |                      |    |
|------------------|-------|-----------|--------------------------------------------------|------|--------|-------|-----------------------------------------------------------------|------------------------------------------------------------------------|----------------------|----|
| 133              | 28.71 | 883.4673  | C <sub>44</sub> H <sub>70</sub> O <sub>15</sub>  | −2.7 | 308.63 | +HCOO | 769.4738, 637.4315, 475.3785,<br>391.2843, 161.0439             | PPT-Glc-Xyl-But                                                        | ginsenoside          | PN |
| 135 <sup>a</sup> | 29.11 | 1239.6390 | C <sub>59</sub> H <sub>100</sub> O <sub>27</sub> | 0.9  | 364.21 | −H    | 1239.6375, 1107.5948, 945.5413,<br>783.4900, 459.3826           | notoginsenoside R4                                                     | ginsenoside          | PN |
| 136              | 29.19 | 815.4809  | C <sub>41</sub> H <sub>70</sub> O <sub>13</sub>  | 1.3  | 295.41 | +HCOO | 769.4738, 637.4332, 475.3802                                    | chikusetsusaponin LM1 or its<br>isomer                                 | ginsenoside          | PN |
| 137              | 29.50 | 901.5163  | C <sub>46</sub> H <sub>78</sub> O <sub>17</sub>  | −0.4 | 315.46 | −H    | 901.5150, 769.4733, 475.3780,<br>191.0548, 149.0439, 131.0332   | chikusetsusaponin L5 or its isomer                                     | ginsenoside          | PN |
| 138              | 30.03 | 329.2323  | C <sub>18</sub> H <sub>34</sub> O <sub>5</sub>   | −3.1 | 182.41 | −H    | 329.2325, 229.1431, 211.1332,<br>183.1356, 171.1022             | 9,10,13-trihydroxy-( <i>E</i> )-11-<br>octadecenoic acid or its isomer | organic acid         | CP |
| 139              | 30.42 | 769.4741  | C <sub>41</sub> H <sub>70</sub> O <sub>13</sub>  | −0.3 | 300.76 | −H    | 769.4737, 637.4326, 475.3787,<br>391.2842                       | chikusetsusaponin LM1 or its<br>isomer                                 | ginsenoside          | PN |
| 140 <sup>a</sup> | 30.66 | 783.4897  | C <sub>42</sub> H <sub>72</sub> O <sub>13</sub>  | −0.5 | 296.14 | −H    | 783.4891, 637.4312, 475.3782,<br>391.2839, 161.0442             | 20( <i>S</i> )-ginsenoside Rg2                                         | ginsenoside          | PN |
| 141              | 30.72 | 577.3736  | C <sub>33</sub> H <sub>52</sub> O <sub>8</sub>   | 0.2  | 249.36 | +H    | 577.3734, 415.3203, 253.1946                                    | trillin or its isomer                                                  | steroidal<br>saponin | PS |
| 142 <sup>a</sup> | 30.91 | 683.4373  | C <sub>36</sub> H <sub>62</sub> O <sub>9</sub>   | −0.4 | 274.41 | +HCOO | 683.4371, 637.4316, 475.3782,<br>391.2844, 161.0436             | 20( <i>S</i> )-ginsenoside Rh1                                         | ginsenoside          | PN |
| 143 <sup>a</sup> | 31.18 | 1239.6379 | C <sub>59</sub> H <sub>100</sub> O <sub>27</sub> | 0.0  | 368.50 | −H    | 1239.6375, 1107.5948, 945.5413,<br>783.4900, 621.4374, 459.3826 | notoginsenoside Fa                                                     | ginsenoside          | PN |
| 144              | 31.48 | 577.3739  | C <sub>33</sub> H <sub>52</sub> O <sub>8</sub>   | 0.6  | 248.03 | +H    | 577.3736, 415.3201, 253.1944                                    | trillin or its isomer                                                  | steroidal<br>saponin | PS |
| 146              | 31.48 | 739.4275  | C <sub>39</sub> H <sub>62</sub> O <sub>13</sub>  | 1.7  | 299.39 | +H    | 739.4282, 577.3736, 415.3201,<br>271.2053, 253.1944             | funkioside C or its isomer                                             | steroidal<br>saponin | PS |
| 145              | 31.48 | 871.4712  | C <sub>44</sub> H <sub>70</sub> O <sub>17</sub>  | 3.0  | 341.13 | +H    | 871.4712, 709.4168, 577.3736,<br>415.3201, 253.1944             | polygonatoside C1 or its isomer                                        | steroidal<br>saponin | PS |

|                  |       |           |                                                 |      |        |       |                                                                     |                                                                                                                        |                   |    |
|------------------|-------|-----------|-------------------------------------------------|------|--------|-------|---------------------------------------------------------------------|------------------------------------------------------------------------------------------------------------------------|-------------------|----|
| 147              | 31.48 | 885.4864  | C <sub>45</sub> H <sub>72</sub> O <sub>17</sub> | 2.5  | 327.04 | +H    | 739.4282, 723.4317, 577.3736, 415.3201, 253.1944                    | gracillin or its isomer                                                                                                | steroidal saponin | PS |
| 148              | 31.5  | 577.3740  | C <sub>33</sub> H <sub>52</sub> O <sub>8</sub>  | 0.8  | 247.77 | +H    | 415.3220, 271.2037                                                  | trillin or its isomer                                                                                                  | steroidal saponin | PS |
| 149 <sup>a</sup> | 31.51 | 783.4903  | C <sub>42</sub> H <sub>72</sub> O <sub>13</sub> | 0.3  | 301.07 | −H    | 783.4893, 637.4320, 475.3791                                        | 20( <i>R</i> )-ginsenoside Rg2                                                                                         | ginsenoside       | PN |
| 150              | 31.84 | 1105.5804 | C <sub>54</sub> H <sub>90</sub> O <sub>23</sub> | 0.4  | 345.59 | −H    | 1105.5794, 943.5286, 781.4741                                       | 5,6-didehydroginsenoside Rb1 or its isomer                                                                             | ginsenoside       | PN |
| 151              | 32.51 | 683.4374  | C <sub>36</sub> H <sub>62</sub> O <sub>9</sub>  | −0.3 | 279.53 | +HCOO | 683.4376, 637.4324, 475.3785                                        | chikusetsusaponin L10 or its isomer                                                                                    | ginsenoside       | PN |
| 152              | 33.64 | 577.3735  | C <sub>33</sub> H <sub>52</sub> O <sub>8</sub>  | 0.1  | 249.06 | +H    | 577.3720, 415.3192, 271.2055, 253.1944                              | trillin or its isomer                                                                                                  | steroidal saponin | PS |
| 153              | 33.71 | 739.4276  | C <sub>39</sub> H <sub>62</sub> O <sub>13</sub> | 1.8  | 300.38 | +H    | 739.4267, 577.3730, 415.3204, 271.2046, 253.1944                    | funkioside C or its isomer                                                                                             | steroidal saponin | PS |
| 154              | 33.72 | 871.4705  | C <sub>44</sub> H <sub>70</sub> O <sub>17</sub> | 2.2  | 343.14 | +H    | 871.4703, 709.4170, 577.3730, 415.3204, 271.2046, 253.1944          | polygonatoside C1 or its isomer                                                                                        | steroidal saponin | PS |
| 155              | 34.24 | 203.1787  | C <sub>15</sub> H <sub>22</sub>                 | −3.6 | 212.40 | +H    | 203.1785, 189.1628, 173.1321, 133.1001, 119.0841, 105.0683, 95.0841 | α-Vatirenene or its isomer                                                                                             | other             | NJ |
| 156              | 34.27 | 783.4885  | C <sub>42</sub> H <sub>72</sub> O <sub>13</sub> | −2.0 | 302.44 | −H    | 783.4902, 765.4792, 621.4374, 459.3838, 221.0655                    | 3- <i>O</i> -β-D-glucopyranosyl-(1→2)-β-D-glucopyranoside-12β,25-dihydroxydammar-( <i>E</i> )-20(22)-ene or its isomer | ginsenoside       | PN |
| 157              | 34.30 | 945.5442  | C <sub>48</sub> H <sub>82</sub> O <sub>18</sub> | 1.4  | 214.52 | −H    | 945.5424, 783.4902, 621.4373, 459.3838, 179.0547                    | notoginsenoside K or its isomer                                                                                        | ginsenoside       | PN |
| 158 <sup>a</sup> | 34.32 | 1107.5957 | C <sub>54</sub> H <sub>92</sub> O <sub>23</sub> | 0.0  | 268.73 | −H    | 1107.5955, 945.5424, 783.4902, 621.4373, 459.3838, 179.0547         | ginsenoside Rb1                                                                                                        | ginsenoside       | PN |
| 159              | 36.17 | 1087.5337 | C <sub>53</sub> H <sub>84</sub> O <sub>23</sub> | 0.6  | 354.15 | −H    | 1087.5336, 731.4374                                                 | lancemasides D or its isomer                                                                                           | ginsenoside       | PN |

|                  |       |           |                                                 |      |        |       |                                                                                                                            |                   |    |
|------------------|-------|-----------|-------------------------------------------------|------|--------|-------|----------------------------------------------------------------------------------------------------------------------------|-------------------|----|
| 160              | 36.20 | 1193.5973 | C <sub>57</sub> H <sub>94</sub> O <sub>26</sub> | 1.0  | 345.26 | –H    | 1149.6064, 1107.5971, 1089.5821, malonylfloralginsenoside Rb2 or its isomer                                                | ginsenoside       | PN |
| 161              | 36.21 | 1149.6087 | C <sub>56</sub> H <sub>94</sub> O <sub>24</sub> | 2.2  | 222.13 | –H    | 1149.6064, 1107.5971, 1089.5821, 6"-O-acetyl-ginsenoside Rb1 or its isomer                                                 | ginsenoside       | PN |
| 162              | 36.36 | 885.4846  | C <sub>45</sub> H <sub>72</sub> O <sub>17</sub> | 0.4  | 321.03 | +H    | 885.4815, 723.4322, 577.3721, 415.3174 gracillin or its isomer                                                             | steroidal saponin | PS |
| 164              | 36.42 | 577.3737  | C <sub>33</sub> H <sub>52</sub> O <sub>8</sub>  | 0.3  | 249.00 | +H    | 577.3739, 415.3202, 271.2051, 253.1941 trillin or its isomer                                                               | steroidal saponin | PS |
| 163              | 36.42 | 739.4278  | C <sub>39</sub> H <sub>62</sub> O <sub>13</sub> | 2.1  | 300.25 | +H    | 739.4286, 723.4330, 577.3739, 415.3202, 253.1941 funkioside C or its isomer                                                | steroidal saponin | PS |
| 165              | 36.44 | 739.4660  | C <sub>40</sub> H <sub>68</sub> O <sub>12</sub> | 2.9  | 286.50 | –H    | 739.4665, 475.3808 (20S)-6-O-[β-D-xylopyranosyl-(1→2)-β-D-xylopyranosyl]-dammar-24-ene-3β,6α,12β,20-tetrol or its isomer   | ginsenoside       | PN |
| 166              | 36.45 | 883.4685  | C <sub>45</sub> H <sub>72</sub> O <sub>17</sub> | –1.3 | 309.30 | –H    | 883.4704, 737.4079 3-O-β-D-glucopyranosyl-(1→4)-[α-L-rhamnopyranosyl(1→2)]-β-D-glucopyranosyl-diosgen (PO-3) or its isomer | steroidal saponin | PS |
| 167              | 36.65 | 1087.5361 | C <sub>53</sub> H <sub>84</sub> O <sub>23</sub> | 2.8  | 362.21 | –H    | 1087.5330, 925.4812 lancemasides D or its isomer                                                                           | ginsenoside       | PN |
| 168 <sup>a</sup> | 37.09 | 1209.6277 | C <sub>58</sub> H <sub>98</sub> O <sub>26</sub> | 0.2  | 350.67 | –H    | 1209.6271, 1077.5847, 945.5426, 783.4900, 621.4385 ginsenoside Ra1                                                         | ginsenoside       | PN |
| 169              | 37.15 | 1149.6094 | C <sub>56</sub> H <sub>94</sub> O <sub>24</sub> | 2.7  | 221.04 | –H    | 1149.6083, 1107.5968, 945.5426, 6"-O-acetyl-ginsenoside Rb1 or its isomer                                                  | ginsenoside       | PN |
| 170              | 37.17 | 1193.5962 | C <sub>57</sub> H <sub>94</sub> O <sub>26</sub> | 0.1  | 337.89 | –H    | 1149.6071, 1107.5919, 1089.5854 malonylfloralginsenoside Rb2 or its isomer                                                 | ginsenoside       | PN |
| 171 <sup>a</sup> | 37.91 | 829.4591  | C <sub>41</sub> H <sub>68</sub> O <sub>14</sub> | 0.0  | 299.65 | +HCOO | 829.4591 Astragaloside A                                                                                                   | ginsenoside       | PN |

|                  |       |           |                                                 |      |        |       |                                         |                      |                                                                               |             |    |
|------------------|-------|-----------|-------------------------------------------------|------|--------|-------|-----------------------------------------|----------------------|-------------------------------------------------------------------------------|-------------|----|
| 172 <sup>a</sup> | 37.96 | 683.4373  | C <sub>36</sub> H <sub>62</sub> O <sub>9</sub>  | −0.4 | 269.70 | +HCOO | 683.4388, 391.2829, 161.0438            | 637.4341, 475.3789,  | 20( <i>S</i> )-ginsenoside F1                                                 | ginsenoside | PN |
| 173 <sup>a</sup> | 38.37 | 1077.5853 | C <sub>53</sub> H <sub>90</sub> O <sub>22</sub> | 0.2  | 352.56 | −H    | 1077.5854, 621.4370                     | 945.5430, 783.4906,  | ginsenoside Rb2                                                               | ginsenoside | PN |
| 174 <sup>a</sup> | 38.79 | 1123.5906 | C <sub>53</sub> H <sub>90</sub> O <sub>22</sub> | 0.0  | 352.54 | +HCOO | 1077.5854, 945.5421, 783.4920           |                      | ginsenoside Rb3                                                               | ginsenoside | PN |
| 175 <sup>a</sup> | 38.89 | 925.4792  | C <sub>47</sub> H <sub>74</sub> O <sub>18</sub> | −1.2 | 320.36 | −H    | 925.4787, 569.3809                      | 775.4212, 613.3723,  | araloside A                                                                   | ginsenoside | PN |
| 176              | 39.26 | 1077.5854 | C <sub>53</sub> H <sub>90</sub> O <sub>22</sub> | 0.3  | 352.87 | −H    | 1077.5848, 621.4380                     | 945.5407, 783.4904,  | notoginsenoside L or its isomer                                               | ginsenoside | PN |
| 177 <sup>a</sup> | 39.32 | 943.5270  | C <sub>48</sub> H <sub>80</sub> O <sub>18</sub> | −0.2 | 322.72 | −H    | 943.5258, 781.4743                      |                      | 5,6-didehydroginsenoside Rd                                                   | ginsenoside | PN |
| 178              | 39.85 | 1149.6068 | C <sub>56</sub> H <sub>94</sub> O <sub>24</sub> | 0.5  | 356.13 | −H    | 1149.6059, 783.4882                     | 1107.5959, 945.5461, | 6"- <i>O</i> -acetyl-ginsenoside Rb1 or its isomer                            | ginsenoside | PN |
| 179              | 40.13 | 929.5502  | C <sub>48</sub> H <sub>82</sub> O <sub>17</sub> | 2.5  | 325.50 | −H    | 929.5482, 605.4427                      | 783.4912, 767.4894,  | vinaginsenoside R3 or its isomer                                              | ginsenoside | PN |
| 180 <sup>a</sup> | 40.52 | 945.5438  | C <sub>48</sub> H <sub>82</sub> O <sub>18</sub> | 1.0  | 320.00 | −H    | 945.5432, 459.3842, 375.2896, 161.0441  | 783.4907, 621.4377,  | ginsenoside Rd                                                                | ginsenoside | PN |
| 181              | 41.23 | 1031.5426 | C <sub>51</sub> H <sub>84</sub> O <sub>21</sub> | −0.6 | 317.57 | −H    | 987.5538, 945.5430, 783.4910            |                      | malonyl-ginsenoside Re or its isomer                                          | ginsenoside | PN |
| 182              | 41.76 | 913.4444  | C <sub>45</sub> H <sub>70</sub> O <sub>19</sub> | 0.6  | 300.59 | −H    | 913.4413, 751.3902                      |                      | notoginsenoside LX or its isomer                                              | ginsenoside | PN |
| 183              | 41.87 | 1175.6267 | C <sub>58</sub> H <sub>96</sub> O <sub>24</sub> | 4.1  | 360.35 | −H    | 1175.6253, 783.4918, 621.4366, 459.3834 | 1107.5982, 945.5420, | ginsenoside Ra6 or its isomer                                                 | ginsenoside | PN |
| 184              | 41.89 | 945.5432  | C <sub>48</sub> H <sub>82</sub> O <sub>18</sub> | 0.4  | 315.00 | −H    | 945.5420, 459.3834                      | 783.4918, 621.4366,  | gypenoside XVII or its isomer                                                 | ginsenoside | PN |
| 185              | 42.05 | 637.4317  | C <sub>36</sub> H <sub>62</sub> O <sub>9</sub>  | −0.6 | 278.11 | −H    | 637.4322, 475.3789                      |                      | 3- <i>O</i> -β-D-glucopyranosyl-20( <i>S</i> )-protopanaxatriol or its isomer | ginsenoside | PN |

|                  |       |          |                                                 |      |        |       |                                        |                                                                                                                                                                   |             |    |
|------------------|-------|----------|-------------------------------------------------|------|--------|-------|----------------------------------------|-------------------------------------------------------------------------------------------------------------------------------------------------------------------|-------------|----|
| 186              | 42.05 | 679.4424 | C <sub>38</sub> H <sub>64</sub> O <sub>10</sub> | −0.4 | 279.34 | −H    | 637.4322, 475.3789                     | 6'-acetyl ginsenoside-F1 or its isomer                                                                                                                            | ginsenoside | PN |
| 187              | 42.30 | 915.5305 | C <sub>47</sub> H <sub>80</sub> O <sub>17</sub> | −1.9 | 319.83 | −H    | 915.5323, 753.4781, 621.4446           | 3- <i>O</i> -β-D-glucopyranosyl-20- <i>O</i> -[α- <i>L</i> -arabinopyranosyl(1→2)-β-D-glucopyranosyl]-3β,12β,20( <i>S</i> )-trihydroxydammar-24-ene or its isomer | ginsenoside | PN |
| 188              | 42.81 | 915.5318 | C <sub>47</sub> H <sub>80</sub> O <sub>17</sub> | −0.5 | 320.07 | −H    | 915.5313, 783.4900, 621.4365, 459.3837 | 3- <i>O</i> -β-D-glucopyranosyl-20- <i>O</i> -[α- <i>L</i> -arabinopyranosyl(1→2)-β-D-glucopyranosyl]-3β,12β,20( <i>S</i> )-trihydroxydammar-24-ene or its isomer | ginsenoside | PN |
| 189              | 42.90 | 797.4696 | C <sub>41</sub> H <sub>68</sub> O <sub>12</sub> | 0.4  | 294.31 | +HCOO | 751.6460, 619.4212                     | notoginsenoside T5 or its isomer                                                                                                                                  | ginsenoside | PN |
| 190              | 43.37 | 751.4636 | C <sub>41</sub> H <sub>68</sub> O <sub>12</sub> | −0.2 | 299.26 | −H    | 751.4632, 619.4212, 116.9273           | notoginsenoside T5 or its isomer                                                                                                                                  | ginsenoside | PN |
| 191 <sup>a</sup> | 43.78 | 811.4857 | C <sub>42</sub> H <sub>70</sub> O <sub>12</sub> | 1.0  | 303.12 | +HCOO | 765.4792, 619.4202                     | ginsenoside F4                                                                                                                                                    | ginsenoside | PN |
| 192 <sup>a</sup> | 44.02 | 665.4267 | C <sub>36</sub> H <sub>60</sub> O <sub>8</sub>  | −0.4 | 273.40 | +HCOO | 665.4284, 619.4213, 161.0442           | ginsenoside Rk3                                                                                                                                                   | ginsenoside | PN |
| 193 <sup>a</sup> | 44.57 | 665.4272 | C <sub>36</sub> H <sub>60</sub> O <sub>8</sub>  | 0.2  | 276.11 | +HCOO | 665.4274, 619.4211, 161.0453           | ginsenoside Rh4                                                                                                                                                   | ginsenoside | PN |
| 194              | 44.76 | 925.4805 | C <sub>47</sub> H <sub>74</sub> O <sub>18</sub> | 0.3  | 336.15 | −H    | 925.4793, 551.3767, 455.3543           | 3- <i>O</i> -β-D-xylopyranosyl-(1→2)-β-D-glucopyranosyl-28- <i>O</i> -β-D-glucopyranosyl oleanolic acid or its isomer                                             | ginsenoside | PN |
| 195              | 44.96 | 915.5334 | C <sub>47</sub> H <sub>80</sub> O <sub>17</sub> | 1.2  | 330.18 | −H    | 915.5328, 783.4905, 621.4370           | 3- <i>O</i> -β-D-glucopyranosyl-20- <i>O</i> -[α- <i>L</i> -arabinopyranosyl(1→2)-β-D-glucopyranosyl]-3β,12β,20( <i>S</i> )-trihydroxydammar-24-ene or its isomer | ginsenoside | PN |

|                  |       |          |                                                 |      |        |       |                                                  |                                                                                        |              |    |
|------------------|-------|----------|-------------------------------------------------|------|--------|-------|--------------------------------------------------|----------------------------------------------------------------------------------------|--------------|----|
| 196 <sup>a</sup> | 44.97 | 829.4954 | C <sub>42</sub> H <sub>72</sub> O <sub>13</sub> | -0.1 | 303.83 | +HCOO | 829.4948, 783.4905, 621.4370                     | ginsenoside F2                                                                         | ginsenoside  | PN |
|                  |       |          |                                                 |      |        |       |                                                  | 3- <i>O</i> - $\beta$ -D-xylopyranosyl-(1 $\rightarrow$ 2)- $\beta$ -                  |              |    |
| 197              | 45.20 | 925.4806 | C <sub>47</sub> H <sub>74</sub> O <sub>18</sub> | 0.4  | 338.47 | -H    | 925.4806, 731.4372, 569.3852, 455.3515           | D-glucopyranosyl-28- <i>O</i> - $\beta$ -D-glucopyranosyl oleanolic acid or its isomer | ginsenoside  | PN |
| 198              | 45.69 | 313.2373 | C <sub>18</sub> H <sub>34</sub> O <sub>4</sub>  | -3.5 | 181.92 | -H    | 313.2387, 295.2257, 183.1382                     | 9,10-dihydroxy-12-octadecenoic acid or its isomer                                      | organic acid | CP |
| 199              | 46.13 | 425.3771 | C <sub>30</sub> H <sub>48</sub> O               | -1.7 | 213.74 | +H    | 425.3771, 257.2268, 189.1633                     | taraxerone or its isomer                                                               | terpenoid    | CP |
| 200 <sup>a</sup> | 46.14 | 783.4903 | C <sub>42</sub> H <sub>72</sub> O <sub>13</sub> | 0.3  | 301.53 | -H    | 783.4897, 621.4373, 459.3840, 375.2894, 116.9273 | ginsenoside Rg3                                                                        | ginsenoside  | PN |
|                  |       |          |                                                 |      |        |       |                                                  | 3- <i>O</i> - $\beta$ -D-glucopyranosyl-(1 $\rightarrow$ 2)- $\beta$ -                 |              |    |
| 201              | 46.47 | 783.4909 | C <sub>42</sub> H <sub>72</sub> O <sub>13</sub> | 1.1  | 299.10 | -H    | 783.4901, 621.4380, 459.3841, 375.2900, 116.9275 | D-glucopyranoside-12 $\beta$ ,25-dihydroxydammar-( <i>E</i> )-20(22)-ene or its isomer | ginsenoside  | PN |
| 202 <sup>a</sup> | 49.80 | 765.4800 | C <sub>42</sub> H <sub>70</sub> O <sub>12</sub> | 0.7  | 307.95 | -H    | 765.4799, 603.4263                               | ginsenoside Rk1                                                                        | ginsenoside  | PN |
| 203              | 49.99 | 235.1682 | C <sub>15</sub> H <sub>22</sub> O <sub>2</sub>  | -4.6 | 160.05 | +H    | 235.1687, 179.1048                               | kanshone I or its isomer                                                               | other        | NJ |
| 204 <sup>a</sup> | 50.22 | 765.4800 | C <sub>42</sub> H <sub>70</sub> O <sub>12</sub> | 0.7  | 315.04 | -H    | 765.4796, 603.4281, 116.9274                     | ginsenoside Rg5                                                                        | ginsenoside  | PN |
| 205              | 50.51 | 295.2269 | C <sub>18</sub> H <sub>32</sub> O <sub>3</sub>  | -3.4 | 179.57 | -H    | 295.2253, 279.2321, 277.2178                     | 9-hydroxy-10,12-octadecadienoic acid or its isomer                                     | organic acid | CP |

<sup>a</sup> Components identified with the aid of reference compounds comparison.

Source: CP: Codonopsis Radix; PS: Polygonati Rhizoma; NJ: Nardostachyos Radix et Rhizoma

**Table S5.** Calibration curves, linearity, LOQ, LOQ, intra-day/inter-day precision, stability, repeatability, recovery, and matrix effect for the UHPLC-sMRM approach targeting to quantify 24 analytes of WXG.

| Analytes           | Calibration curves       | r      | Linear range<br>(ng/mL) | LOQ<br>(pg) | LOD<br>(pg) | Concentration | Recovery<br>(n=3, %) | RSD (%)       |               |           |               | Matrix<br>effects<br>(%) |
|--------------------|--------------------------|--------|-------------------------|-------------|-------------|---------------|----------------------|---------------|---------------|-----------|---------------|--------------------------|
|                    |                          |        |                         |             |             |               |                      | Inter-<br>day | Intra-<br>day | Stability | Repeatability |                          |
| syringin           | $y = 884.2x + 730.6$     | 0.9993 | 2.5–500                 | 0.63        | 0.00031     | Low           | $86.6 \pm 7.0$       | 2.0           | 2.8           | 4.2       | 9.6           | 108.1                    |
|                    |                          |        |                         |             |             | Medium        | $85.7 \pm 1.7$       | 3.4           | 1.5           |           |               |                          |
|                    |                          |        |                         |             |             | High          | $88.1 \pm 1.8$       | 3.2           | 1.9           |           |               |                          |
| notoginsenoside R1 | $y = 5291.9x + 175140.0$ | 0.9968 | 100–20000               | 0.098       | 0.049       | Low           | $85.9 \pm 8.0$       | 4.6           | 4.1           | 5.7       | 8.5           | 92.0                     |
|                    |                          |        |                         |             |             | Medium        | $92.1 \pm 4.3$       | 3.3           | 2.0           |           |               |                          |
|                    |                          |        |                         |             |             | High          | $94.0 \pm 4.5$       | 6.5           | 2.6           |           |               |                          |
| lobetyolin         | $y = 7924.9x + 13885.9$  | 0.9990 | 5–1000                  | 0.078       | 0.039       | Low           | $87.1 \pm 10.3$      | 1.2           | 2.7           | 3.8       | 9.3           | 109.0                    |
|                    |                          |        |                         |             |             | Medium        | $85.6 \pm 2.4$       | 3.6           | 2.5           |           |               |                          |
|                    |                          |        |                         |             |             | High          | $86.0 \pm 2.1$       | 3.4           | 1.5           |           |               |                          |
| ginsenoside Re     | $y = 3274.1x + 48734.1$  | 0.9978 | 50–10000                | 0.049       | 0.024       | Low           | $90.6 \pm 9.8$       | 9.9           | 7.1           | 5.3       | 7.4           | 80.1                     |
|                    |                          |        |                         |             |             | Medium        | $92.6 \pm 8.1$       | 8.9           | 3.2           |           |               |                          |
|                    |                          |        |                         |             |             | High          | $96.3 \pm 5.5$       | 6.0           | 2.0           |           |               |                          |
| ginsenoside Rg1    | $y = 1813.9x + 55841.2$  | 0.9957 | 125–25000               | 0.49        | 0.12        | Low           | $91.0 \pm 14.6$      | 4.0           | 4.3           | 3.6       | 6.5           | 83.5                     |
|                    |                          |        |                         |             |             | Medium        | $86.0 \pm 5.3$       | 3.9           | 1.7           |           |               |                          |
|                    |                          |        |                         |             |             | High          | $103.8 \pm 13.1$     | 4.6           | 1.7           |           |               |                          |
| ginsenoside Rf     | $y = 16558.0x + 6346.3$  | 0.9989 | 1–200                   | 0.063       | 0.031       | Low           | $92.1 \pm 5.6$       | 2.5           | 2.6           | 4.4       | 9.8           | 105.9                    |
|                    |                          |        |                         |             |             | Medium        | $93.6 \pm 3.4$       | 2.1           | 1.4           |           |               |                          |
|                    |                          |        |                         |             |             | High          | $85.8 \pm 2.4$       | 4.2           | 1.8           |           |               |                          |



|                                   |                           |        |            |        |        |        |                  |      |     |     |     |       |
|-----------------------------------|---------------------------|--------|------------|--------|--------|--------|------------------|------|-----|-----|-----|-------|
| 20( <i>S</i> )-notoginsenoside R2 | $y = 13080.6x + 156512.0$ | 0.9956 | 25–2500    | 0.012  | 0.0061 | Low    | $85.9 \pm 6.6$   | 2.9  | 2.3 | 3.6 | 8.2 | 93.6  |
|                                   |                           |        |            |        |        | Medium | $91.8 \pm 3.5$   | 2.6  | 1.8 |     |     |       |
|                                   |                           |        |            |        |        | High   | $98.6 \pm 1.5$   | 4.2  | 1.5 |     |     |       |
| notoginsenoside Fa                | $y = 232.4x + 276.6$      | 0.9985 | 5–1000     | 0.63   | 0.078  | Low    | $99.6 \pm 14.6$  | 12.2 | 5.1 | 6.0 | 8.3 | 85.2  |
|                                   |                           |        |            |        |        | Medium | $97.9 \pm 6.3$   | 12.6 | 2.0 |     |     |       |
|                                   |                           |        |            |        |        | High   | $88.3 \pm 11.5$  | 5.4  | 3.6 |     |     |       |
| 20( <i>S</i> )-ginsenoside Rg2    | $y = 14067.9x + 174596.0$ | 0.9958 | 25–5000    | 0.098  | 0.049  | Low    | $98.3 \pm 6.8$   | 2.6  | 2.7 | 3.4 | 8.8 | 91.8  |
|                                   |                           |        |            |        |        | Medium | $102.6 \pm 2.5$  | 2.8  | 2.1 |     |     |       |
|                                   |                           |        |            |        |        | High   | $106.3 \pm 0.9$  | 4.2  | 1.5 |     |     |       |
| 20( <i>S</i> )-ginsenoside Rh1    | $y = 1424.2x + 13890.2$   | 0.9983 | 25–5000    | 0.20   | 0.0015 | Low    | $99.4 \pm 8.9$   | 3.1  | 2.7 | 3.3 | 9.4 | 102.6 |
|                                   |                           |        |            |        |        | Medium | $100.2 \pm 2.1$  | 2.2  | 2.0 |     |     |       |
|                                   |                           |        |            |        |        | High   | $99.8 \pm 1.6$   | 4.5  | 1.9 |     |     |       |
| ginsenoside Rb1                   | $y = 856.1x + 11571.9$    | 0.9995 | 62.5–25000 | 0.12   | 0.031  | Low    | $107.8 \pm 8.8$  | 11.0 | 2.4 | 5.8 | 8.8 | 98.2  |
|                                   |                           |        |            |        |        | Medium | $106.3 \pm 10.1$ | 8.9  | 1.0 |     |     |       |
|                                   |                           |        |            |        |        | High   | $109.6 \pm 5.5$  | 4.4  | 2.3 |     |     |       |
| ginsenoside Ra1                   | $y = 886.5x + 1153.3$     | 0.9994 | 5–1000     | 0.31   | 0.16   | Low    | $85.7 \pm 6.8$   | 13.0 | 4.0 | 5.8 | 8.8 | 85.1  |
|                                   |                           |        |            |        |        | Medium | $85.6 \pm 6.6$   | 11.7 | 3.1 |     |     |       |
|                                   |                           |        |            |        |        | High   | $86.6 \pm 7.7$   | 6.0  | 3.0 |     |     |       |
| ginsenoside Rb2                   | $y = 1433.9x + 3001.1$    | 0.9992 | 10–2000    | 5.00   | 2.50   | Low    | $94.0 \pm 7.9$   | 14.0 | 3.8 | 7.7 | 8.4 | 85.6  |
|                                   |                           |        |            |        |        | Medium | $89.2 \pm 5.5$   | 13.1 | 2.5 |     |     |       |
|                                   |                           |        |            |        |        | High   | $89.2 \pm 4.5$   | 5.1  | 2.6 |     |     |       |
| 20( <i>S</i> )-ginsenoside F1     | $y = 6977.8x + 25180.3$   | 0.9980 | 10–2000    | 0.16   | 0.020  | Low    | $95.2 \pm 9.1$   | 2.4  | 2.6 | 3.5 | 8.1 | 100.3 |
|                                   |                           |        |            |        |        | Medium | $96.2 \pm 1.5$   | 6.3  | 1.0 |     |     |       |
|                                   |                           |        |            |        |        | High   | $96.8 \pm 1.8$   | 3.4  | 1.7 |     |     |       |
| araloside A                       | $y = 1949.9x + 1108.4$    | 0.9995 | 2–400      | 0.0039 | 0.0020 | Low    | $93.1 \pm 6.4$   | 4.7  | 3.7 | 3.2 | 8.3 | 104.2 |

|                     |                        |        |           |        |        |        |              |      |     |     |     |       |
|---------------------|------------------------|--------|-----------|--------|--------|--------|--------------|------|-----|-----|-----|-------|
| ginsenoside Rd      | y = 5681.0x + 206959.0 | 0.9980 | 100–10000 | 0.39   | 0.20   | Medium | 95.6 ± 4.0   | 3.4  | 2.0 | 3.8 | 9.0 | 89.0  |
|                     |                        |        |           |        |        | High   | 92.6 ± 8.9   | 2.9  | 0.9 |     |     |       |
|                     |                        |        |           |        |        | Low    | 87.5 ± 3.4   | 7.4  | 4.3 |     |     |       |
| ginsenoside F4      | y = 18973.0x + 18468.4 | 0.9985 | 2.5–500   | 0.078  | 0.039  | Medium | 85.3 ± 4.9   | 5.8  | 1.8 | 4.1 | 8.6 | 107.1 |
|                     |                        |        |           |        |        | High   | 104.3 ± 3.6  | 4.5  | 1.5 |     |     |       |
|                     |                        |        |           |        |        | Low    | 97.8 ± 6.4   | 1.6  | 2.7 |     |     |       |
| atractylenolide III | y = 18421.2x + 4850.0  | 0.9973 | 1–200     | 0.13   | 0.063  | Medium | 100.9 ± 4.1  | 4.6  | 1.7 | 5.4 | 9.3 | 108.2 |
|                     |                        |        |           |        |        | High   | 98.2 ± 0.5   | 2.6  | 1.7 |     |     |       |
|                     |                        |        |           |        |        | Low    | 112.0 ± 4.9  | 7.0  | 3.7 |     |     |       |
| ginsenoside Rk3     | y = 1749.9x + 3098.0   | 0.9983 | 5–1000    | 1.25   | 0.63   | Medium | 100.1 ± 12.1 | 4.7  | 5.0 | 3.9 | 8.1 | 103.0 |
|                     |                        |        |           |        |        | High   | 108.3 ± 7.7  | 13.1 | 3.5 |     |     |       |
|                     |                        |        |           |        |        | Low    | 100.7 ± 6.0  | 2.0  | 2.9 |     |     |       |
| ginsenoside F2      | y = 2420.9x + 8505.8   | 0.9985 | 10–2000   | 0.16   | 0.020  | Medium | 100.9 ± 3.3  | 4.2  | 1.8 | 7.3 | 7.3 | 93.59 |
|                     |                        |        |           |        |        | High   | 100.7 ± 1.0  | 3.9  | 1.7 |     |     |       |
|                     |                        |        |           |        |        | Low    | 95.3 ± 5.9   | 11.4 | 4.7 |     |     |       |
| ginsenoside Rh4     | y = 119.2x + 4308.0    | 0.9985 | 100–20000 | 25.00  | 6.25   | Medium | 98.0 ± 3.6   | 10.6 | 2.3 | 4.0 | 7.2 | 101.3 |
|                     |                        |        |           |        |        | High   | 98.2 ± 3.7   | 4.8  | 1.0 |     |     |       |
|                     |                        |        |           |        |        | Low    | 98.8 ± 8.3   | 2.2  | 3.6 |     |     |       |
| ginsenoside Rg3     | y = 15271.2x + 3.8     | 0.9969 | 5–1000    | 0.0049 | 0.0012 | Medium | 95.4 ± 2.2   | 5.4  | 1.9 | 4.7 | 8.3 | 94.9  |
|                     |                        |        |           |        |        | High   | 96.5 ± 2.5   | 3.4  | 1.6 |     |     |       |
|                     |                        |        |           |        |        | Low    | 86.5 ± 8.5   | 2.7  | 3.7 |     |     |       |
| ginsenoside Rk1     | y = 6515.8x + 13914.6  | 0.9981 | 5–1000    | 0.0098 | 0.0049 | Medium | 90.7 ± 5.6   | 1.4  | 2.0 | 8.1 | 9.9 | 85.3  |
|                     |                        |        |           |        |        | High   | 92.6 ± 3.4   | 5.3  | 2.0 |     |     |       |
|                     |                        |        |           |        |        | Low    | 95.6 ± 7.2   | 3.8  | 4.7 |     |     |       |
|                     |                        |        |           |        |        | Medium | 100.0 ± 2.6  | 3.2  | 1.2 |     |     |       |
|                     |                        |        |           |        |        | High   | 98.8 ± 3.2   | 7.5  | 3.7 |     |     |       |

|                 |                      |        |        |        |        |        |                |     |     |     |     |      |
|-----------------|----------------------|--------|--------|--------|--------|--------|----------------|-----|-----|-----|-----|------|
| ginsenoside Rg5 | $y = 14511.8x + 3.7$ | 0.9958 | 5–1000 | 0.0049 | 0.0012 | Low    | $88.2 \pm 5.6$ | 3.8 | 3.5 | 7.2 | 8.9 | 86.2 |
|                 |                      |        |        |        |        | Medium | $92.6 \pm 2.4$ | 2.9 | 1.0 |     |     |      |
|                 |                      |        |        |        |        | High   | $93.0 \pm 1.3$ | 8.8 | 2.7 |     |     |      |

**Table S6.** The contents of 24 analytes in 27 batches of WXG samples (mg/bag).

| Analytes             | Batch No. |       |       |       |       |       |       |       |       |       |       |       |       |       |       |       |       |       |       |       |       |       |       |       |       |       |       |
|----------------------|-----------|-------|-------|-------|-------|-------|-------|-------|-------|-------|-------|-------|-------|-------|-------|-------|-------|-------|-------|-------|-------|-------|-------|-------|-------|-------|-------|
|                      | 1         | 2     | 3     | 4     | 5     | 6     | 7     | 8     | 9     | 10    | 11    | 12    | 13    | 14    | 15    | 16    | 17    | 18    | 19    | 20    | 21    | 22    | 23    | 24    | 25    | 26    | 27    |
| syringin             | 0.08      | 0.15  | 0.12  | 0.06  | 0.12  | 0.10  | 0.11  | 0.11  | 0.09  | 0.13  | 0.08  | 0.06  | 0.08  | 0.15  | 0.08  | 0.07  | 0.06  | 0.06  | 0.05  | 0.05  | 0.06  | 0.05  | 0.05  | 0.06  | 0.07  | 0.08  | 0.06  |
| noto-R1*             | 2.08      | 2.28  | 2.59  | 3.30  | 2.46  | 2.57  | 2.87  | 2.88  | 2.51  | 3.45  | 2.90  | 3.02  | 3.24  | 3.87  | 2.60  | 2.27  | 3.12  | 3.01  | 3.14  | 3.00  | 2.38  | 3.37  | 3.23  | 3.30  | 3.29  | 3.59  | 3.63  |
| lobetyolin           | 0.14      | 0.20  | 0.20  | 0.12  | 0.23  | 0.12  | 0.14  | 0.14  | 0.13  | 0.17  | 0.15  | 0.11  | 0.17  | 0.19  | 0.13  | 0.08  | 0.10  | 0.10  | 0.09  | 0.08  | 0.09  | 0.07  | 0.10  | 0.10  | 0.11  | 0.12  | 0.13  |
| Re                   | 0.91      | 0.89  | 1.01  | 1.23  | 0.99  | 0.98  | 1.10  | 1.05  | 1.00  | 1.32  | 1.07  | 1.15  | 1.23  | 1.52  | 1.01  | 0.93  | 1.19  | 1.11  | 1.19  | 1.13  | 0.97  | 1.30  | 1.23  | 1.26  | 1.24  | 1.37  | 1.42  |
| Rg1*                 | 12.82     | 12.86 | 14.81 | 16.56 | 14.02 | 14.40 | 15.13 | 15.03 | 13.83 | 17.30 | 14.66 | 15.36 | 16.08 | 18.83 | 12.74 | 11.61 | 13.71 | 13.34 | 13.48 | 13.40 | 11.83 | 14.39 | 13.88 | 14.24 | 14.18 | 15.38 | 15.59 |
| Rf                   | 0.02      | 0.02  | 0.02  | 0.02  | 0.02  | 0.02  | 0.02  | 0.02  | 0.02  | 0.02  | 0.02  | 0.02  | 0.02  | 0.03  | 0.02  | 0.02  | 0.02  | 0.02  | 0.02  | 0.02  | 0.02  | 0.02  | 0.02  | 0.02  | 0.02  | 0.02  | 0.03  |
| 20(S)-noto-R2        | 0.36      | 0.40  | 0.45  | 0.51  | 0.38  | 0.43  | 0.46  | 0.47  | 0.44  | 0.54  | 0.46  | 0.42  | 0.47  | 0.58  | 0.46  | 0.40  | 0.51  | 0.48  | 0.46  | 0.45  | 0.38  | 0.53  | 0.52  | 0.49  | 0.53  | 0.56  | 0.59  |
| noto-Fa              | 0.26      | 0.22  | 0.27  | 0.28  | 0.24  | 0.26  | 0.26  | 0.26  | 0.25  | 0.31  | 0.24  | 0.26  | 0.26  | 0.33  | 0.26  | 0.23  | 0.30  | 0.24  | 0.26  | 0.27  | 0.24  | 0.32  | 0.29  | 0.31  | 0.32  | 0.36  | 0.38  |
| 20(S)- Rg2           | 0.31      | 0.32  | 0.36  | 0.38  | 0.31  | 0.35  | 0.36  | 0.37  | 0.34  | 0.42  | 0.34  | 0.33  | 0.36  | 0.45  | 0.36  | 0.33  | 0.39  | 0.35  | 0.34  | 0.35  | 0.32  | 0.39  | 0.38  | 0.38  | 0.39  | 0.42  | 0.43  |
| 20(S)- Rh1           | 0.52      | 0.62  | 0.61  | 0.62  | 0.47  | 0.59  | 0.63  | 0.68  | 0.66  | 0.68  | 0.58  | 0.49  | 0.58  | 0.70  | 0.65  | 0.61  | 0.66  | 0.58  | 0.53  | 0.55  | 0.51  | 0.60  | 0.69  | 0.54  | 0.72  | 0.65  | 0.78  |
| Rb1*                 | 8.98      | 8.73  | 10.57 | 11.89 | 9.45  | 10.48 | 10.31 | 10.57 | 9.90  | 12.28 | 10.53 | 10.45 | 10.90 | 13.77 | 10.43 | 8.92  | 11.89 | 9.86  | 10.12 | 10.69 | 9.38  | 11.95 | 11.81 | 11.97 | 12.43 | 13.49 | 13.63 |
| Ra1                  | 0.03      | 0.03  | 0.04  | 0.05  | 0.03  | 0.03  | 0.03  | 0.03  | 0.04  | 0.05  | 0.04  | 0.05  | 0.05  | 0.06  | 0.04  | 0.03  | 0.05  | 0.04  | 0.04  | 0.04  | 0.03  | 0.05  | 0.05  | 0.05  | 0.06  | 0.06  | 0.06  |
| Rb2                  | 0.07      | 0.08  | 0.12  | 0.14  | 0.09  | 0.09  | 0.09  | 0.09  | 0.11  | 0.14  | 0.13  | 0.13  | 0.14  | 0.16  | 0.12  | 0.10  | 0.16  | 0.15  | 0.14  | 0.14  | 0.10  | 0.16  | 0.15  | 0.16  | 0.16  | 0.17  | 0.18  |
| 20(S)-F1             | 0.07      | 0.05  | 0.07  | 0.08  | 0.05  | 0.06  | 0.06  | 0.06  | 0.07  | 0.07  | 0.06  | 0.06  | 0.07  | 0.08  | 0.07  | 0.06  | 0.08  | 0.07  | 0.07  | 0.07  | 0.06  | 0.08  | 0.08  | 0.08  | 0.09  | 0.09  | 0.10  |
| chikusetsusaponin IV | 0.01      | 0.01  | 0.01  | 0.02  | 0.01  | 0.02  | 0.02  | 0.02  | 0.02  | 0.02  | 0.02  | 0.02  | 0.02  | 0.02  | 0.02  | 0.01  | 0.02  | 0.02  | 0.02  | 0.02  | 0.01  | 0.02  | 0.02  | 0.02  | 0.02  | 0.02  | 0.02  |
| Rd                   | 1.61      | 1.56  | 1.76  | 2.28  | 1.70  | 1.93  | 1.92  | 2.00  | 1.97  | 2.42  | 2.06  | 2.15  | 2.33  | 2.70  | 2.16  | 1.85  | 2.45  | 2.27  | 2.24  | 2.31  | 1.86  | 2.49  | 2.43  | 2.51  | 2.59  | 2.76  | 2.82  |
| F4                   | 0.02      | 0.03  | 0.03  | 0.02  | 0.01  | 0.03  | 0.03  | 0.03  | 0.03  | 0.03  | 0.03  | 0.02  | 0.02  | 0.03  | 0.04  | 0.04  | 0.04  | 0.03  | 0.03  | 0.03  | 0.02  | 0.03  | 0.04  | 0.02  | 0.04  | 0.03  | 0.04  |
| atractylenolide III  | 0.01      | 0.01  | 0.01  | 0.01  | 0.01  | 0.01  | 0.01  | 0.01  | 0.01  | 0.01  | 0.01  | 0.01  | 0.01  | 0.01  | 0.01  | 0.01  | 0.01  | 0.01  | 0.01  | 0.01  | 0.01  | 0.01  | 0.01  | 0.01  | 0.01  | 0.01  | 0.01  |
| Rk3                  | 0.07      | 0.11  | 0.09  | 0.08  | 0.05  | 0.09  | 0.09  | 0.11  | 0.12  | 0.11  | 0.09  | 0.06  | 0.08  | 0.10  | 0.14  | 0.13  | 0.15  | 0.12  | 0.10  | 0.10  | 0.07  | 0.12  | 0.15  | 0.09  | 0.16  | 0.11  | 0.16  |
| F2                   | 0.04      | 0.03  | 0.03  | 0.04  | 0.03  | 0.04  | 0.03  | 0.03  | 0.03  | 0.03  | 0.03  | 0.03  | 0.03  | 0.03  | 0.04  | 0.04  | 0.03  | 0.03  | 0.03  | 0.04  | 0.04  | 0.04  | 0.05  | 0.04  | 0.05  | 0.05  | 0.05  |
| Rh4                  | 1.71      | 3.00  | 2.35  | 2.14  | 1.25  | 2.31  | 2.36  | 2.83  | 3.01  | 2.69  | 2.31  | 1.44  | 2.07  | 2.63  | 3.17  | 3.13  | 3.27  | 2.64  | 2.13  | 2.23  | 1.74  | 2.62  | 3.46  | 1.99  | 3.54  | 2.59  | 3.69  |

|                 |       |       |       |       |       |       |       |       |       |       |       |       |       |       |       |       |       |       |       |       |       |       |       |       |       |       |       |
|-----------------|-------|-------|-------|-------|-------|-------|-------|-------|-------|-------|-------|-------|-------|-------|-------|-------|-------|-------|-------|-------|-------|-------|-------|-------|-------|-------|-------|
| Rg3             | 0.12  | 0.20  | 0.16  | 0.17  | 0.10  | 0.14  | 0.17  | 0.19  | 0.21  | 0.19  | 0.21  | 0.14  | 0.19  | 0.18  | 0.19  | 0.18  | 0.17  | 0.14  | 0.13  | 0.13  | 0.11  | 0.15  | 0.19  | 0.12  | 0.19  | 0.15  | 0.19  |
| Rk1             | 0.06  | 0.11  | 0.08  | 0.08  | 0.04  | 0.08  | 0.09  | 0.10  | 0.11  | 0.10  | 0.10  | 0.06  | 0.09  | 0.09  | 0.13  | 0.14  | 0.13  | 0.10  | 0.10  | 0.10  | 0.06  | 0.12  | 0.14  | 0.09  | 0.14  | 0.12  | 0.15  |
| Rg5             | 0.06  | 0.11  | 0.09  | 0.08  | 0.05  | 0.08  | 0.09  | 0.10  | 0.11  | 0.10  | 0.10  | 0.07  | 0.09  | 0.10  | 0.11  | 0.12  | 0.12  | 0.09  | 0.09  | 0.09  | 0.06  | 0.10  | 0.12  | 0.08  | 0.13  | 0.10  | 0.12  |
| sum of CP marks | 23.87 | 23.88 | 27.97 | 31.75 | 25.93 | 27.45 | 28.30 | 28.48 | 26.23 | 33.03 | 28.09 | 28.83 | 30.22 | 36.47 | 25.77 | 22.80 | 28.72 | 26.21 | 26.74 | 27.09 | 23.60 | 29.71 | 28.92 | 29.51 | 29.90 | 32.46 | 32.84 |

\*Three ginsenosides recorded by the Chinese Pharmacopoeia, 27 batches of WXG were qualified.
